1 **Characterization of the apicomplexan amino acid transporter (ApiAT) family in**

2 *Toxoplasma gondii*

3

4 Short Title: Amino acid transporters in *Toxoplasma* parasites

5

6 Kathryn E. R. Parker<sup>1,¶</sup>, Stephen J. Fairweather<sup>1,¶</sup>, Esther Rajendran<sup>1,¶</sup>, Martin Blume<sup>2,3</sup>,

7 Malcolm J. McConville<sup>2</sup>, Stefan Bröer<sup>1,\*</sup>, Kiaran Kirk<sup>1,\*</sup>, Giel G. van Dooren<sup>1,\*</sup>

8

9 <sup>1</sup>Research School of Biology, Australian National University, Canberra, ACT, 2601,

10 Australia.

11 <sup>2</sup>Department of Biochemistry and Molecular Biology and the Bio21 Institute of Molecular

12 Science and Biotechnology, University of Melbourne, Parkville, VIC, 3010, Australia.

13 <sup>3</sup>Robert Koch Institute, Berlin, 13353, Germany.

14

15 \*Corresponding authors

16 Emails: [giel.vandooren@anu.edu.au](mailto:giel.vandooren@anu.edu.au); [kiaran.kirk@anu.edu.au](mailto:kiaran.kirk@anu.edu.au); [stefan.broeer@anu.edu.au](mailto:stefan.broeer@anu.edu.au)

17 <sup>¶</sup>Joint first authors

18

19 **Abstract**

20 Apicomplexan parasites are auxotrophic for a range of amino acids which must be salvaged  
21 from their host cells, either through direct uptake or degradation of host proteins. Here, we  
22 describe a family of plasma membrane-localized amino acid transporters, termed the  
23 Apicomplexan Amino acid Transporters (ApiATs), that are ubiquitous in apicomplexan  
24 parasites. Functional characterization of the ApiATs of *Toxoplasma gondii* indicate that  
25 several of these transporters are important for intracellular growth of the tachyzoite stage of  
26 the parasite, which is responsible for acute infections. We demonstrate that the ApiAT  
27 protein *TgApiAT5-3* is an exchanger for aromatic and large neutral amino acids, with  
28 particular importance for L-tyrosine scavenging and amino acid homeostasis, and that  
29 *TgApiAT5-3* is critical for parasite virulence. Our data indicate that *T. gondii* expresses  
30 additional proteins involved in the uptake of aromatic amino acids, and we present a model  
31 for the uptake and homeostasis of these amino acids. Our findings identify a family of amino  
32 acid transporters in apicomplexans, and highlight the importance of amino acid scavenging  
33 for the biology of this important phylum of intracellular parasites.

34

35 **Author Summary**

36 The Apicomplexa comprise a large number of parasitic protozoa that have obligate  
37 intracellular lifestyles and cause significant human and animal diseases, including malaria,  
38 cryptosporidiosis, toxoplasmosis, coccidiosis in poultry, and various cattle fevers.  
39 Apicomplexans must scavenge essential nutrients from their hosts in order to proliferate and  
40 cause disease, including a range of amino acids. The direct uptake of these nutrients is  
41 presumed to be mediated by transporter proteins located in the plasma membrane of  
42 intracellular stages, although the identities of these proteins are poorly defined. Using a  
43 combination of bioinformatic, genetic, cell biological, and physiological approaches, we have  
44 characterized a family of plasma membrane-localized transporter proteins that we have called  
45 the Apicomplexan Amino acid Transporters (ApiATs). The family is found in apicomplexans  
46 and their closest free-living relatives. We show that *TgApiAT5-3*, a member of the family in  
47 the apicomplexan *Toxoplasma gondii*, is an exchanger for aromatic and large neutral amino  
48 acids. In particular, it is critical for uptake of tyrosine, and for parasite virulence in a mouse  
49 infection model. We conclude that ApiATs are a family of plasma membrane transporters  
50 that play crucial roles in amino acid scavenging by apicomplexan parasites.

51

## 52 **Introduction**

53 Apicomplexans are intracellular parasites that cause a range of diseases in humans and  
54 animals, imparting a major health and economic burden on many countries. In humans,  
55 *Plasmodium* species are the causative agents of malaria, while *Cryptosporidium* is a major  
56 cause of diarrheal disease and death in children in the developing world (1). *Toxoplasma*  
57 *gondii* can infect virtually all nucleated cells in warm-blooded animals, and is thought to  
58 chronically infect one-third of the world's human population. *T. gondii* infections are usually  
59 asymptomatic, but infection in immunocompromised patients may lead to life-threatening  
60 toxoplasmic encephalitis, and congenital toxoplasmosis may result in severe birth defects or  
61 death of the developing fetus (2).

62 A common feature of parasites is that they rely on their hosts to supply them with the  
63 nutrients necessary for their growth and replication, such as sugars, amino acids, nucleosides,  
64 and vitamins. Transporters are integral membrane proteins that facilitate the transfer of  
65 substrates across biological membranes. In apicomplexans, transporters provide the major  
66 route for the acquisition of nutrients and the removal of waste products across the plasma  
67 membrane (3), and these proteins are important for parasite survival and virulence (4, 5).  
68 Despite this, the transporters responsible for the uptake of many essential nutrients in  
69 apicomplexans have not been defined.

70 A family of Novel Putative Transporters (the NPT family) was initially identified in  
71 *Plasmodium falciparum* using a bioinformatics approach (6). The five *P. falciparum* NPT  
72 family proteins were predicted to be polytopic membrane proteins with a secondary structure  
73 characteristic of solute transporters, although they have limited sequence similarity to other  
74 eukaryotic or prokaryotic transporters. The NPT family protein *PbNPT1* localizes to the  
75 plasma membrane of the mouse malaria-causing parasite *P. berghei*, and is essential for  
76 gametocyte development in the murine host and subsequent mosquito transmission (4, 5, 7).

77 Other *P. berghei* NPT family proteins, *PbMFR4* and *PbMFR5*, are essential for progression  
78 through the insect stages of the life cycle, while *PbMFR2* and *PbMFR3* are important for  
79 exflagellation of male gametes and sporozoite formation, respectively, but are not essential  
80 for completion of the *P. berghei* life cycle (4). In *T. gondii*, *TgNPT1* localizes to the plasma  
81 membrane and is essential for parasite growth and virulence (5). Both *PbNPT1* and *TgNPT1*  
82 are cationic amino acid transporters, with *PbNPT1* functioning as a general cationic amino  
83 acid transporter and *TgNPT1* functioning as a selective arginine transporter (5). The functions  
84 of other NPT-family proteins are not known, although one member of the family has been  
85 associated with susceptibility to the anti-*T. gondii* drug sinefungin (8).

86 In this study, we have demonstrated that the NPTs are phylogenetically related, and broadly  
87 distributed within the apicomplexan phylum and their closest free-living relatives. We have  
88 characterized the NPT family proteins in *T. gondii*, demonstrating that 10 of the sixteen  
89 members of the family are expressed in the disease-causing tachyzoite stage of the parasite,  
90 and that the majority of these localize to the parasite plasma membrane. We have  
91 demonstrated that at least three of these proteins are important for *in vitro* growth of the  
92 parasite. Using a combination of genetic, physiological and heterologous expression  
93 approaches, we have shown that one of the previously uncharacterized *T. gondii* NPT-family  
94 members transports aromatic and large neutral amino acids, and that this transporter is  
95 particularly important for the uptake of tyrosine into the parasite. We conclude that NPTs are  
96 a family of amino acid transporter proteins found in apicomplexans, and we propose that the  
97 family be renamed the Apicomplexan Amino acid Transporter (ApiAT) family.

98

## 99 **Results**

100 **ApiATs are broadly-distributed in apicomplexan parasites.** To identify ApiAT-family  
101 proteins in the apicomplexan parasites *T. gondii*, *Neospora caninum*, *Eimeria tenella*, *P.*  
102 *falciparum*, *P. berghei*, *Theileria annulata*, *Babesia bovis* and *Cryptosporidium parvum*, we  
103 undertook Basic Local Alignment Search Tool (BLAST) searches using *PbNPT1* as an initial  
104 query sequence ([www.eupathdb.org](http://www.eupathdb.org); (9)) We also undertook BLAST searches of the  
105 genomes from the chromerids *Chromera velia* and *Vitrella brassicaformis*, which are close  
106 free-living relatives of apicomplexans (10), and a broad range of other eukaryotes  
107 ([www.eupathdb.org](http://www.eupathdb.org), [www.blast.ncbi.nlm.nih.gov](http://www.blast.ncbi.nlm.nih.gov); (9, 11)). In addition to the previously  
108 described five *Plasmodium* ApiAT family proteins, we identified sixteen ApiAT family  
109 proteins in both *T. gondii* and *N. caninum*, nine in *E. tenella*, six in *T. annulata*, five in *B.*  
110 *bovis*, three in *V. brassicaformis*, and one each in *C. parvum* and *C. velia* (Fig S1). Using this  
111 strategy, we were unable to identify ApiAT family proteins outside of the  
112 apicomplexan/chromerid lineage. Using *PbNPT1* as a search query in profile hidden Markov  
113 Model searches, we identified the LAT3 and LAT4 proteins from humans (<http://hmmer.org>;  
114 (12); Fig S2). LAT3 and LAT4 are members of the SLC43 family of the major facilitator  
115 superfamily of transporters, and mediate the transport of branched chain and other large  
116 neutral amino acids (13).

117 To determine the relationships between ApiAT family proteins, we constructed a multiple  
118 sequence alignment. This revealed the presence of a major facilitator superfamily (MFS)  
119 signature sequence between transmembrane domains 2 and 3 of most ApiAT family protein  
120 (Fig S1; (14, 15)). Most ApiAT proteins were predicted to be polytopic membrane proteins  
121 containing 12 transmembrane domains ([www.cbs.dtu.dk/services/TMHMM/](http://www.cbs.dtu.dk/services/TMHMM/); (16)), and  
122 exhibited highest sequence similarity in the regions encompassing these transmembrane  
123 domains (Fig S1). These analyses are consistent with previous studies and protein database

124 annotations placing members of the ApiAT family into the major facilitator superfamily of  
125 transporters (5, 6).

126 We next performed a maximum likelihood phylogenetic analysis. This revealed the presence  
127 of multiple ApiAT subfamilies (Fig 1). Orthologs of the ApiAT2 subfamily were present in  
128 all organisms in the study, with the exception of *Cryptosporidium parvum* and the free living  
129 Chromerid species (Fig 1). Members of the ApiAT3, ApiAT5, ApiAT6 and ApiAT7  
130 subfamilies were restricted to coccidians (a group of apicomplexans that includes *T. gondii*  
131 and *N. caninum*), and the ApiAT9 family was restricted to the piroplasms *T. annulata* and *B.*  
132 *bovis* (Fig 1). *Plasmodium* ApiAT3 branched with the coccidian ApiAT3 subfamily, although  
133 bootstrap support for this association was weak (Fig 1). The ApiAT8 subfamily comprises  
134 two members in each *Plasmodium* species examined. This family includes the previously  
135 described cationic transporter *PbNPT1* (here annotated as *PbApiAT8-1*). Although similar in  
136 function to the *T. gondii* arginine transporter *TgApiAT1* (previously *TgNPT1*), *PbApiAT8-1*  
137 and *TgApiAT1* appear not to be orthologous.

138

139 ***T. gondii* ApiATs localize to the parasite periphery.** Previous studies demonstrated that the  
140 *P. berghei* ApiAT8-1 protein (previously *PbNPT1*) localized to the periphery of the parasite  
141 (likely to the plasma membrane), and that the *T. gondii* ApiAT1 protein (previously *TgNPT1*)  
142 localized to the plasma membrane (5, 7). To determine the expression pattern and localization  
143 of ApiAT family proteins in *T. gondii*, we introduced a hemagglutinin (HA) tag into the 3'  
144 end of the open reading frame of the remaining fifteen ApiAT genes (Fig S3A-B).

145 Western blotting indicated that *TgApiAT2*, *TgApiAT3-1*, *TgApiAT3-2*, *TgApiAT3-3*,  
146 *TgApiAT5-3*, *TgApiAT6-1*, *TgApiAT6-2*, *TgApiAT6-3*, and *TgApiAT7-2* proteins were  
147 expressed in tachyzoite stage parasites (Fig 2A-E). We were unable to detect expression of

148 *TgApiAT5-1*, *TgApiAT5-2*, *TgApiAT5-4*, *TgApiAT5-5*, *TgApiAT5-6* and *TgApiAT7-1*.  
149 Immunofluorescence assays (IFAs) demonstrated that *TgApiAT2*, *TgApiAT3-1*, *TgApiAT3-*  
150 *2*, *TgApiAT3-3*, *TgApiAT5-3*, *TgApiAT6-1* (as reported previously; (17)), and *TgApiAT6-3*  
151 localized to parasite periphery, overlapping with the plasma membrane marker P30 (Fig 2F-  
152 I). *TgApiAT3-3* showed additional localization to the trans-Golgi network (Fig 2G).  
153 Although detectable by western blotting (Fig 2D-E), we could not detect *TgApiAT6-3* or  
154 *TgApiAT7-2* by IFA, possibly because the level of expression of these proteins was below  
155 the detection limits of IFAs. We conclude that ten of the sixteen *TgApiAT* proteins are  
156 expressed in the tachyzoite stage of *T. gondii*, and those with detectable expression by IFA all  
157 localize to the plasma membrane of the parasite.

158 To determine the importance of *TgApiATs* for parasite growth, we attempted to genetically  
159 disrupt all sixteen *T. gondii* *ApiATs* using a CRISPR/Cas9-based approach (18). Using this  
160 strategy, we were able to disrupt fifteen of the sixteen *TgApiAT* genes (Table S1). *TgApiAT1*  
161 could only be disrupted when parasites were grown in excess arginine, as described  
162 previously (5). We were unable to generate frameshift mutations in *TgApiAT6-1* after  
163 screening 12 clones from three separate transfections of a guide RNA targeting the  
164 *TgApiAT6-1* locus. Of these clones, two had a 3 bp insertion and one had a 3 bp deletion,  
165 indicating that the guide RNA was capable of targeting the *TgApiAT6-1* locus (Table S1).

166 To determine which *TgApiATs* were important for parasite growth, we performed plaque  
167 assays on each of the *TgApiAT* knockout ( $\Delta$ *apiAT*) lines grown in human foreskin fibroblasts  
168 (HFFs) and cultured in Dulbecco's modified Eagle's medium (DMEM). Compared to  
169 parental wild type (WT) controls, we observed greatly reduced plaque sizes in the  $\Delta$ *apiAT2*  
170 and  $\Delta$ *apiAT5-3* strains (Fig 3). As described previously (5), no plaques were observed in the  
171  $\Delta$ *apiAT1* strain grown in DMEM (containing 400  $\mu$ M L-arginine) but normal growth of this  
172 strain was observed when grown in Roswell Park Memorial Institute 1640 (RPMI) medium



173 (containing 1.15 mM L-Arg; Fig 3A). By contrast, the remaining 12  $\Delta$ *apiAT* lines exhibited  
174 plaques that were similar in size to WT controls (Fig 3). To test whether the growth defect in  
175 the  $\Delta$ *apiAT2* strain was due specifically to disruption of the *TgApiAT2* locus, we  
176 complemented  $\Delta$ *apiAT2* with constitutively expressed *TgApiAT2*. This restored parasite  
177 growth (Fig 3B). These results indicate that *TgApiAT1*, *TgApiAT2* and *TgApiAT5-3* are  
178 required for normal intracellular growth of *T. gondii* in standard *in vitro* culture conditions.

179

180 ***TgApiAT5-3* is important for amino acid homeostasis in *T. gondii*.** *TgApiAT* proteins that  
181 are important for parasite growth are likely to have critical roles in nutrient acquisition. In the  
182 remainder of this manuscript, we focus on one such protein, *TgApiAT5-3*. Our previous  
183 study of *TgApiAT1* and *PbApiAT8-1* indicated a key role for these transporters in cationic  
184 amino acid uptake (5), and we hypothesized that *TgApiAT5-3* could also function as an  
185 amino acid transporter. To investigate this possibility, we incubated WT and  $\Delta$ *apiAT5-3*  
186 parasites in medium containing a mixture of [<sup>13</sup>C]-labelled amino acids for 15 mins. Polar  
187 metabolites were extracted from parasite lysates and analyzed by GC-MS. These analyses  
188 were used to quantitate the levels of intracellular amino acids and determine the extent of  
189 labeling with exogenous amino acids based on [<sup>13</sup>C]-enrichment in each of the two strains.  
190 Strikingly, both the abundance and fractional labelling of [<sup>13</sup>C]-L-tyrosine (L-Tyr) was  
191 reduced significantly in the  $\Delta$ *apiAT5-3* strain (Fig 4). Abundance and fractional labeling of a  
192 number of other [<sup>13</sup>C]-amino acids were altered significantly in the  $\Delta$ *apiAT5-3* strain,  
193 although none to the same extent as L-Tyr (Fig 4). These data indicate that *TgApiAT5-3* is  
194 important for amino acid homeostasis, playing a key role in the uptake of L-Tyr into the  
195 parasite.

196

197 ***TgApiAT5-3* is an aromatic and large neutral amino acid uniporter with exchange**  
198 **activity.** To characterize the substrate specificity of *TgApiAT5-3* further, we expressed HA-  
199 tagged *TgApiAT5-3* in *Xenopus laevis* oocytes, and confirmed its expression and plasma  
200 membrane localization by western blotting (Fig S4A). Given the GC-MS data implicating  
201 *TgApiAT5-3* in L-Tyr uptake (Fig 4), we hypothesised that *TgApiAT5-3* transports L-Tyr.  
202 We compared the uptake of radiolabelled [<sup>14</sup>C]-tyrosine ([<sup>14</sup>C]Tyr) into oocytes expressing  
203 *TgApiAT5-3* relative to uninjected oocytes. Under the conditions of the experiment, there  
204 was a significant, 7-fold increase in the initial uptake rate of [<sup>14</sup>C]Tyr into oocytes expressing  
205 *TgApiAT5-3* compared to uninjected control oocytes (Fig 5A).

206 While loss of *TgApiAT5-3* led to reduced uptake of [<sup>13</sup>C]-tyrosine, levels of <sup>13</sup>C enrichment  
207 in some other amino acids increased (Fig 4). This gave rise to the possibility that *TgApiAT5-*  
208 *3* has exchange activity. To investigate this, we tested whether the uptake of [<sup>14</sup>C]Tyr was  
209 stimulated by the presence of amino acids on the *trans* side of the membrane (i.e. *inside* the  
210 oocyte). Following preliminary experiments to optimise the preloading of L-Tyr into oocytes  
211 (not shown), we measured [<sup>14</sup>C]Tyr uptake over 2 hr at an extracellular concentration of 1  
212 mM L-Tyr in *TgApiAT5-3*-injected or uninjected oocytes that had been pre-loaded in  
213 medium containing 2.5 mM unlabelled L-Tyr. The initial rate of [<sup>14</sup>C]Tyr uptake in  
214 *TgApiAT5-3*-expressing oocytes preloaded with L-Tyr was 3-fold higher than in *TgApiAT5-*  
215 *3*-expressed oocytes that were not pre-loaded (Fig 5B), indicating that L-Tyr uptake into  
216 *TgApiAT5-3*-expressing oocytes was stimulated by L-Tyr on the *trans* side of the membrane.  
217 We next tested whether L-Tyr efflux was also *trans*-stimulated. We preloaded *TgApiAT5-3-*  
218 expressing and uninjected oocytes with 1 mM [<sup>14</sup>C]Tyr and measured the efflux and retention  
219 of the radiolabel upon the addition of 2.5 mM unlabelled L-Tyr to the external medium.  
220 [<sup>14</sup>C]Tyr efflux was increased, and [<sup>14</sup>C]Tyr retention reduced, in *TgApiAT5-3*-expressing  
221 oocytes exposed to 2.5 mM L-Tyr compared to those in external medium lacking L-Tyr (Fig

222 5C). Nevertheless, we still observed some [ $^{14}\text{C}$ ]Tyr efflux over time in the absence of *trans*-  
223 substrate (Fig 5C). We observed no differences in [ $^{14}\text{C}$ ]Tyr efflux or retention in control  
224 uninjected oocytes upon incubation of oocytes in 2.5 mM L-Tyr compared to incubation in  
225 buffer lacking L-Tyr (Fig S4B). These data indicate that the transporter operates more  
226 effectively under ‘exchange conditions’ than under conditions in which it is mediating a  
227 unidirectional flux.

228 To examine the exchange activity of *TgApiAT5-3* further, we investigated the kinetic  
229 properties of L-Tyr transport in more detail. Steady-state kinetic parameters for exchangers  
230 must be conducted at different *trans*- and *cis*-substrate concentrations to determine accurate  
231  $K_{0.5}$  values (19). We examined uptake kinetics of [ $^{14}\text{C}$ ]Tyr following the preloading of  
232 oocytes with different L-Tyr concentrations (note that this, and all subsequent, uptake  
233 measurements were conducted over 10 min, representing the approximate initial rate  
234 conditions for substrate influx; Fig 5B). Both Michaelis-Menten analysis (not shown) and  
235 Scatchard linear regressions (Fig 5D) demonstrated that the apparent  $K_{0.5}$  values for L-Tyr  
236 uptake into oocytes was unaffected by the cytosolic L-Tyr concentration. The gradients of  
237 fitted Scatchard plots are negative reciprocals of the apparent  $K_{0.5}$  and, therefore, equivalent  
238 slopes reflect similar apparent transport affinities.  $K_{0.5}$  values were consistent for both  
239 Scatchard and Michaelis-Menten plots derived from the same data, ranging from 0.25 to 0.40  
240  $\mu\text{M}$  (Table 1). As expected for *trans*-stimulated uptake, maximum rate ( $V_{\text{max}}$ ) values  
241 increased in proportion to the concentration of preloaded L-Tyr (Fig 5D; Table 1).

242

243 **Table 1: Michaelis-Menten kinetic parameters for the initial rate of L-Tyr uptake by**  
244 ***TgApiAT5-3*<sup>1</sup>**  
245

| [L-Tyr] <sub>trans</sub> (mM) | Scatchard Linear Regression |                                      | Michaelis-Menten Plot |                                      |
|-------------------------------|-----------------------------|--------------------------------------|-----------------------|--------------------------------------|
|                               | K <sub>0.5</sub> (μM)       | V <sub>max</sub> (pmol/min × oocyte) | K <sub>0.5</sub> (μM) | V <sub>max</sub> (pmol/min × oocyte) |
| 0                             | 0.36                        | 5.23                                 | 0.37                  | 5.43                                 |
| 0.02                          | 0.37                        | 5.70                                 | 0.31                  | 6.06                                 |
| 0.08                          | 0.38                        | 6.25                                 | 0.29                  | 7.91                                 |
| 0.15                          | 0.34                        | 9.13                                 | 0.25                  | 8.93                                 |
| 0.44                          | 0.40                        | 18.83                                | 0.32                  | 15.98                                |
| 1.78                          | 0.39                        | 29.25                                | 0.36                  | 27.0                                 |

246 <sup>1</sup> Values are based on the experiment shown in Fig 5D.  
247

248 To assess whether *TgApiAT5-3* activity might function as an ion:amino acid co-transporter,  
249 we conducted systematic ion-replacement uptake experiments as described previously (5).  
250 We observed no significant change in [<sup>14</sup>C]Tyr uptake under any ion-replacement conditions,  
251 suggesting that the transporter does not co-transport any of the ions tested (Fig S4C). To  
252 determine whether *TgApiAT5-3* is an electrogenic transporter (as is the case for *TgApiAT1*;  
253 (5)), we perfused oocytes expressing *TgApiAT5-3* with L-Tyr and measured currents using a  
254 two-electrode voltage clamp configuration. We observed no net current movement, including  
255 under conditions in which the membrane potential and pH gradient across the membrane  
256 were altered (Fig S4D). Together, these data indicate that L-Tyr transport by *TgApiAT5-3*  
257 does not co-transport any charged species.

258 Incubation of WT and  $\Delta$ *apiAT5-3* parasites in a [<sup>13</sup>C]-amino acid mix resulted in significant  
259 increases or decreases in the <sup>13</sup>C-labelling of several amino acids (Fig 4), suggesting that  
260 *TgApiAT5-3* may transport a range of amino acids. To investigate the substrate specificity of  
261 *TgApiAT5-3* further, we measured the uptake of 500 μM [<sup>14</sup>C]Tyr in oocytes expressing  
262 *TgApiAT5-3* in the presence of equimolar amounts of other unlabelled L-amino acids on the

263 *cis* side of the membrane. Only unlabelled L-tryptophan (L-Trp) resulted in a significant  
264 inhibition of L-Tyr uptake under the conditions tested (Fig S5A). To examine the *trans*-  
265 stimulated influx specificity of *TgApiAT5-3*, we pre-injected mixtures of L-amino acids and  
266 other metabolites into oocytes expressing *TgApiAT5-3*, then measured uptake of [<sup>14</sup>C]Tyr.  
267 *TgApiAT5-3*-mediated [<sup>14</sup>C]Tyr uptake was *trans*-stimulated by pre-injected mixtures of L-  
268 amino acids, but not amino acid derivatives, D-amino acids, nucleotides, nitrogenous bases,  
269 or sugars (Fig S5B; Table S2). To identify which amino acids might be responsible for this  
270 *trans*-stimulation, we systematically pre-injected oocytes expressing *TgApiAT5-3* with 5 mM  
271 of each of the 20 proteinogenic amino acids in the mixture (with the exception of L-Tyr  
272 which was preloaded to equilibrium), before measuring *trans*-stimulated uptake of [<sup>14</sup>C]Tyr.  
273 We found that aromatic and large neutral amino acids, but not smaller or charged amino  
274 acids, *trans*-stimulated [<sup>14</sup>C]Tyr uptake (Fig 6A).

275 We tested the uptake of a range of [<sup>14</sup>C]-labelled aromatic and large neutral amino acids,  
276 including L-Trp, L-histidine (L-His), L-phenylalanine (L-Phe), L-leucine (L-Leu) and L-  
277 isoleucine (L-Ile) into oocytes expressing *TgApiAT5-3*. In the absence of a *trans* substrate,  
278 the rate of uptake of aromatic and large neutral amino acids were significantly increased  
279 compared to uninjected oocytes (1.7-fold increase for L-Trp, 3.1-fold increase for L-His, 5.5-  
280 fold increase for L-Phe, 2.2-fold increase for L-Leu, and 2.4-fold increase for L-Ile; Fig  
281 S5C). The uptake of the cationic amino acid L-Arg did not differ between *TgApiAT5-3*  
282 injected and uninjected oocytes (Fig S5C). As was seen for L-Tyr, uptake of the tested  
283 aromatic and large neutral amino acids was *trans*-stimulated by aromatic and large neutral  
284 amino acids, and not by smaller or charged L-amino acids (Fig 6A). The uptake of L-Arg was  
285 not *trans*-stimulated by any of the amino acids tested (Fig 6A). We next measured efflux of  
286 preloaded [<sup>14</sup>C]-labelled L-Tyr, L-Trp, L-His, L-Phe and L-Leu in the presence of all 20  
287 proteinogenic amino acids in the extracellular medium. We observed the same substrate

288 specificity, with aromatic and large neutral L-amino acids stimulating the efflux of the [<sup>14</sup>C]-  
289 labelled substrates tested (Fig 6B).

290 From the experiments conducted in this section, we conclude that *TgApiAT5-3* can mediate  
291 the transport of aromatic and large neutral amino acids. The transporter can function as a  
292 uniporter, but has a strong propensity for exchange, implying a role for *TgApiAT5-3* in the  
293 homeostasis of a range of aromatic and large neutral amino acids.

294 ***TgApiAT5-3* is important for tyrosine uptake into parasites.** The [<sup>13</sup>C] amino acid uptake  
295 data and oocyte experiments indicate a role for *TgApiAT5-3* in L-Tyr uptake into the parasite  
296 (Fig 4; Fig 5). To test the importance of *TgApiAT5-3* for L-Tyr uptake in *T. gondii*, we  
297 measured the kinetics of [<sup>14</sup>C]Tyr uptake in WT and  $\Delta$ *apiAT5-3* parasites. The initial rate of  
298 [<sup>14</sup>C]Tyr uptake in  $\Delta$ *apiAT5-3* parasites was decreased by 8.5-fold compared to that in WT  
299 parasites (Fig 7A; Fig S6A). Both [<sup>14</sup>C]Tyr uptake and parasite growth were increased upon  
300 complementation of the  $\Delta$ *apiAT5-3* mutant with a constitutively expressed copy of  
301 *TgApiAT5-3* (*cTgApiAT5-3*/ $\Delta$ *apiAT5-3*; Fig 7A; Fig S7). However, uptake was not restored  
302 to WT levels, perhaps as a result of different levels of expression of *TgApiAT5-3* in the WT  
303 and complemented strains.

304 Our previous data indicated that *TgApiAT5-3* can transport other aromatic amino acids (Fig  
305 6, Fig S5A). We measured uptake of [<sup>14</sup>C]Phe in WT and  $\Delta$ *apiAT5-3* parasites. We found a  
306 significant, 2.5-fold decrease in the initial rate of [<sup>14</sup>C]Phe uptake in parasites lacking  
307 *TgApiAT5-3* (Fig. 7B; Fig S6B). We were unable to detect robust levels of uptake of  
308 [<sup>14</sup>C]Trp in either WT or  $\Delta$ *apiAT5-3* parasites, precluding analysis of the role of *TgApiAT5-3*  
309 in uptake of this amino acid into parasites. As a control, we measured uptake of [<sup>14</sup>C]Arg,  
310 which is not transported by *TgApiAT5-3* (Fig 6; Fig S5A), in WT,  $\Delta$ *apiAT5-3* and  
311 *cTgApiAT5-3*/ $\Delta$ *apiAT5-3* strain parasites. We found that the rate of [<sup>14</sup>C]Arg uptake did not

312 differ significantly between these parasite lines (Fig 7C; Fig S6C), indicating that the defect  
313 we observe in the uptake of aromatic amino acids is specific, and does not represent a general  
314 defect in amino acid uptake.

315

316 **Growth of parasites lacking *TgApiAT5-3* is modulated by the concentrations of**  
317 **aromatic amino acids in the growth medium.** We next investigated the dependence of the  
318 growth of  $\Delta apiAT5-3$  parasites on the concentration of L-Tyr in the culture medium. WT and  
319  $\Delta apiAT5-3$  parasites were grown in DMEM containing 0 – 2.5 mM L-Tyr. Growth of WT  
320 parasites in the absence of L-Tyr was severely impaired (Fig S8A), consistent with a previous  
321 study that indicated *T. gondii* parasites are auxotrophic for this amino acid (20). WT parasites  
322 grew normally in [L-Tyr] as low as 10  $\mu$ M (Fig 8A). By comparison, growth of  $\Delta apiAT5-3$   
323 parasites was negligible at [L-Tyr] of 156  $\mu$ M and below, and severely impaired at  
324 concentrations below 1 mM (Fig 8A). We also measured growth of WT,  $\Delta apiAT5-3$  and  
325 *cTgApiAT5-3*/ $\Delta apiAT5-3$  parasites grown in DMEM vs DMEM containing 2.5 mM L-Tyr,  
326 by plaque assay. Consistent with the results of the fluorescence growth assays, plaque assays  
327 revealed that impaired growth of  $\Delta apiAT5-3$  parasites was restored by growth in 2.5 mM L-  
328 Tyr (Fig S7).

329 These data indicate that uptake of L-Tyr via *TgApiAT5-3* is important for the growth of *T.*  
330 *gondii* parasites in standard *in vitro* conditions. They also point to the existence of an  
331 alternative L-Tyr uptake pathway that can mediate sufficient L-Tyr uptake for parasite  
332 growth when parasites are cultured in medium containing  $\geq 1$  mM L-Tyr.

333 To assess the physiological significance of *TgApiAT5-3*-mediated L-Phe uptake for parasite  
334 growth, WT and  $\Delta apiAT5-3$  were cultivated in medium containing 0 to 10 mM L-Phe (at a  
335 constant [L-Tyr] of 423  $\mu$ M, the concentration of this amino acid in DMEM). WT parasites

336 grew minimally in the absence of L-Phe (Fig S8B), indicating that *T. gondii* is auxotrophic  
337 for this amino acid, but grew normally at [L-Phe] of 39  $\mu$ M and above (Fig 8B). By contrast,  
338 growth of  $\Delta$ apiAT5-3 parasites was impaired at 39  $\mu$ M [L-Phe] (Fig 8B).  $\Delta$ apiAT5-3 parasites  
339 grew optimally at [L-Phe] between 78  $\mu$ M and 625  $\mu$ M, but parasite growth decreased at [L-  
340 Phe] of 1.25 mM and above (Fig 8B).

341 We next measured the growth of WT and  $\Delta$ apiAT5-3 parasites in medium containing 0 – 1  
342 mM L-Trp (and a constant [L-Tyr] of 423  $\mu$ M). WT parasites grew minimally in the absence  
343 of L-Trp (Fig S8C), consistent with a previous study that indicated *T. gondii* is auxotrophic  
344 for this amino acid (21). WT parasites grew optimally at 1 mM [L-Trp], and exhibited  
345 decreased growth with decreasing [L-Trp] (Fig 8C). By contrast,  $\Delta$ apiAT5-3 parasites grew  
346 optimally at 16 – 125  $\mu$ M L-Trp (Fig 8C). Growth of  $\Delta$ apiAT5-3 parasites was negligible at 4  
347  $\mu$ M L-Trp (a concentration at which growth of WT parasites is only moderately impaired),  
348 and also decreased at [L-Trp] of 250  $\mu$ M and above (Fig 8C), mirroring the effects observed  
349 with growth of the mutant at a range of [L-Phe].

350 Together, these data reveal that *Tg*ApiAT5-3 is required for parasite growth at low  
351 exogenous concentrations of L-Phe and L-Trp, but not at intermediate concentrations. This  
352 points to the existence of other L-Phe and L-Trp uptake pathways in the parasite. Notably,  
353 *Tg*ApiAT5-3 is required for parasite growth at high exogenous L-Phe and L-Trp  
354 concentrations. This observation suggests that high concentrations of L-Phe or L-Trp may  
355 competitively inhibit uptake of L-Tyr via the alternative, non-*Tg*ApiAT5-3 L-Tyr uptake  
356 pathway (considered further in the Discussion).

357

358 ***Tg*ApiAT5-3 is important for parasite virulence.** Standard media formulations used to  
359 culture parasite *in vitro* do not necessarily reflect the amino acid concentrations that parasites



360 encounter *in vivo*. Since the importance of *Tg*ApiAT5-3 for parasite growth *in vitro* is  
361 dependent on the concentrations of aromatic amino acids in the growth medium (Fig 8A-C),  
362 we investigated the importance of *Tg*ApiAT5-3 for parasite virulence in a mouse infection  
363 model. In preliminary experiments, we found that the parental TATi/Tomato WT parasite  
364 strain was avirulent in mice, precluding an analysis of whether  $\Delta$ *apiAT5-3* parasites are  
365 virulent. We therefore remade the  $\Delta$ *apiAT5-3* mutant in virulent RH $\Delta$ *hxgp*rt/Tomato strain  
366 parasites (22).  $\Delta$ *apiAT5-3*/RH $\Delta$ *hxgp*rt/Tomato parasites were defective in uptake of [<sup>14</sup>C]Tyr  
367 (Fig S9A), and were dependent on high levels of exogenous L-Tyr for growth (Fig S9B).  
368 Notably, when we compared the growth of  $\Delta$ *apiAT5-3*/RH $\Delta$ *hxgp*rt/Tomato parasites to  
369 parental RH $\Delta$ *hxgp*rt/Tomato parasites by plaque assay we found that, although growth in 2.5  
370 mM Tyr partially restored growth of  $\Delta$ *apiAT5-3*/RH $\Delta$ *hxgp*rt/Tomato strain parasites, this  
371 strain still grew slower than the parental parasites (Fig S9C). This is in contrast to the  
372 equivalent experiment with  $\Delta$ *apiAT5-3*/TATi/Tomato parasites (Fig S7), and suggests some  
373 inter-strain differences in the importance of *Tg*ApiAT5-3 for *in vitro* growth, or in the  
374 availability of L-Tyr in the intracellular niche created by different strains.

375 We infected BALB/c mice intraperitoneally with 10<sup>3</sup> WT (RH $\Delta$ *hxgp*rt/Tomato) or  $\Delta$ *apiAT5-*  
376 *3*/RH $\Delta$ *hxgp*rt/Tomato parasites and monitored disease progression. Mice infected with WT  
377 parasites exhibited symptoms of toxoplasmosis and were euthanized 6 days post-infection  
378 (Fig 8D). In contrast, mice infected with  $\Delta$ *apiAT5-3* parasites exhibited no symptoms of  
379 toxoplasmosis across the entire 62 days of the experiment (Fig 8D), indicating that  
380 *Tg*ApiAT5-3 is essential for parasite virulence.

381

382 **Discussion**

383 The evolution of apicomplexan ancestors from a free-living to an obligate parasitic life-style  
384 was associated with the loss of numerous biosynthetic pathways, including those for amino  
385 acid synthesis (23, 24). In particular, *T. gondii* is auxotrophic for many amino acids,  
386 including the aromatic amino acids L-Tyr, L-Phe and L-Trp ((5, 20, 21, 25-27); this study).  
387 Parasites must scavenge essential amino acids from their environment, although, in the case  
388 of apicomplexan parasites, how they do so is poorly understood. Here, we characterise a  
389 family of proteins predicted to function as transporters in apicomplexans. Using a  
390 combination of *in vitro*, *in vivo*, and heterologous expression studies, we provide evidence  
391 that these transporters localize to the parasite plasma membrane, and show that *TgApiAT5-3*  
392 functions as an aromatic amino acid transporter in *T. gondii*. We have previously  
393 demonstrated that other members of this family, which we now call *TgApiAT1* (previously  
394 *TgNPT1*) and *PbApiAT8-1* (previously *PbNPT1*), transport cationic amino acids (5). Our  
395 phylogenetic analyses indicate that ApiAT proteins are found throughout the apicomplexan  
396 phylum. To reflect these functions and phylogenetic affinities, we propose to rename this  
397 protein family the *Apicomplexan Amino acid Transporters* (ApiATs).

398 The ApiAT protein family is found in all apicomplexan species that we analyzed, as well as  
399 in chromerids, which are free-living relatives of apicomplexans. Chromerids are prototrophic  
400 for amino acids, although growth of these algae can be enhanced by the addition of glutamate  
401 and glycine to the growth medium, suggesting they can also acquire exogenous amino acids  
402 (28). Understanding the localization and function of chromerid ApiATs may provide valuable  
403 clues to the evolution of this transporter family in apicomplexans. The similarity of ApiATs  
404 to mammalian LAT3/4-type amino acid transporters suggests that the ancestral function of  
405 ApiATs was amino acid transport. The ApiATs appear to have undergone expansion in  
406 various apicomplexan lineages, including *Plasmodium* spp, *T. gondii* and piroplasms such as  
407 *Babesia* spp and *Theileria* spp, whereas only a single representative is present in

408 *Cryptosporidium* spp, an early-diverging lineage of apicomplexans (29). These observations  
409 are consistent with ancestral apicomplexans containing a single ApiAT protein that  
410 diversified in various lineages of the phylum to encompass new and/or more selective amino  
411 acid substrate selectivities.

412 A similar expansion has been observed in the amino acid/auxin permease (AAAP) family of  
413 trypanosomatid parasites, in which fourteen AAAP genes arose from a single AAAP gene  
414 locus through a series of gene duplication events in ancestral trypanosomatids (30). AAAP  
415 expansion is likely to reflect an early parasitic innovation that contributed to establishing  
416 parasite dependency on the host organism, and thereby facilitating the evolution of parasitism  
417 in trypanosomatids (23, 30). By contrast, much of the expansion in the ApiAT family appears  
418 to have occurred subsequent to the diversification of the major lineages in the phylum. Of the  
419 nine ApiAT subfamilies that we define, only the ApiAT2 subfamily is broadly distributed  
420 amongst the major apicomplexan lineages (Fig 1), suggesting its presence before these  
421 lineages diverged. Several subfamilies have undergone expansion within lineages. For  
422 example, the ApiAT3, 5, 6 and 7 subfamilies contain multiple members within coccidians (*T.*  
423 *gondii*, *N. caninum* and *E. tenella*), while piroplasms contain multiple ApiAT2 subfamily  
424 proteins (Fig 1).

425 Much of the expansion of ApiAT proteins, then, appears to have occurred subsequent to the  
426 evolution of parasitism in this phylum. An intriguing possibility is that expansion within  
427 ApiAT subfamilies is linked to expansion of these parasites into different hosts, and cell  
428 types within those hosts. Across their life cycles, apicomplexans such as *T. gondii*,  
429 *Plasmodium* spp and piroplasms must infect different hosts and/or different cell types with  
430 those hosts, which may necessitate amino acid transporters with different substrate affinities  
431 and specificities Our data indicate that ten of the sixteen ApiAT family proteins in *T. gondii*  
432 are expressed in the tachyzoite stage of the life cycle (Fig 2; (5)). Of the ApiAT5 subfamily,

433 we could only detect expression of *TgApiAT5-3* in tachyzoites (Fig 2), and only *TgApiAT5-*  
434 *3* is important for growth of the tachyzoite stage (Fig 3). This raises the possibility that other  
435 *TgApiAT5* subfamily proteins are expressed, and function, at other stages of the life cycle.  
436 Interestingly, proteomic studies identified *TgApiAT5-5* in the oocyst proteome  
437 ([www.toxodb.org](http://www.toxodb.org)), and it could be that this transporter has particular importance at this stage  
438 of the parasite life cycle.

439 Of the fifteen ApiAT family proteins that we were able to disrupt genetically, only the  
440 *TgApiAT1*, *TgApiAT2* and *TgApiAT5-3* mutants exhibited defects in tachyzoite growth (Fig  
441 3). This corresponds to results from a recent genome-wide CRISPR-based screen, in which  
442 these three *TgApiAT* family proteins all had low ‘phenotype scores’ (scores between  $-3.91$   
443 and  $-4.73$ ), an indicator of a gene’s importance for *in vitro* growth of tachyzoites ((31);  
444 scores below  $-1.8$  are considered to be indicative of a gene being ‘important’ for parasite  
445 growth). The remaining *TgApiAT* family proteins had phenotype scores  $> -0.93$  (31),  
446 consistent with the results of our targeted knockout approach which indicated that these  
447 proteins are not important for parasite growth *in vitro* (Fig 3). We were unable to disrupt the  
448 reading frame of *TgApiAT6-1*, despite multiple attempts using a guide RNA that targets the  
449 *TgApiAT6-1* locus (Table S1). *TgApiAT6-1* has a phenotype score of  $-5.4$  (31). It is likely,  
450 then, that our inability to generate a *TgApiAT6-1* knockout is because it is essential for  
451 parasite growth.

452 Our studies of *TgApiAT5-3* demonstrate that this protein is important for parasite growth.  
453 We demonstrated that *TgApiAT5-3* is a high affinity L-Tyr uniporter (Fig 5;  $K_{0.5} \sim 0.3 \mu\text{M}$ ,  
454 Table 1) and that loss of *TgApiAT5-3* leads to defects in L-Tyr uptake into parasites (Fig 4,  
455 Fig 7A). Furthermore, parasites lacking *TgApiAT5-3* were avirulent in mice (Fig 8D), and  
456 could only grow at extracellular L-Tyr concentrations above  $\sim 1 \text{ mM}$  (Fig 8A), well above the  
457 plasma concentration of L-Tyr in mammals (estimated to be  $55\text{-}90 \mu\text{M}$  in human plasma and

458 50-70  $\mu$ M in mouse plasma; (32, 33)). Together, our data point to an essential role for  
459 *TgApiAT5-3* in scavenging L-Tyr from the host.

460 Our oocyte studies indicated that *TgApiAT5-3* can function as an exchanger, with the rate of  
461 uptake of L-Tyr and other aromatic and large neutral amino acids enhanced when equivalent  
462 amino acids were present on the *trans* side of the membrane (Fig 6). Mammalian amino acid  
463 transporters function either as ‘loaders’ (i.e. uniporters that facilitate the uptake of amino  
464 acids into cells) or ‘harmonizers’ (i.e. exchangers that are essential for the maintenance of  
465 homeostatic amino acid concentrations) (34). By contrast, our data indicate that *TgApiAT5-3*  
466 performs an unusual dual function in facilitating both the net uptake of L-Tyr into the  
467 parasite, and maintaining intracellular pools of aromatic and large neutral amino acids  
468 through exchange. Maintaining amino acid homeostasis is critical for facilitating cellular  
469 metabolism and growth, and it is likely that *TgApiAT5-3* has a critical role in balancing the  
470 intracellular concentrations of aromatic and large neutral amino acids in the parasite.

471 *X. laevis* expression studies revealed that *TgApiAT5-3* transports L-Phe and L-Trp, as well as  
472 large neutral amino acids such as L-Leu (Fig 6). This raises the possibility that *TgApiAT5-3*  
473 also functions in the net uptake of these amino acids in the parasite. We saw no differences in  
474 the fractional labelling of [ $^{13}\text{C}$ ]-labelled L-Leu or L-Ile in  $\Delta$ *apiAT5-3* parasites compared to  
475 WT parasites (Fig 4), implying that the uptake of these branched-chain amino acids is  
476 facilitated by other transporters in the parasite. Similarly, we observed no defect in the  
477 fractional labelling of [ $^{13}\text{C}$ ]-labelled L-Phe in parasites lacking *TgApiAT5-3* (Fig 4), although  
478 we did observe a defect in the uptake of [ $^{14}\text{C}$ ]Phe in the mutant strain (Fig 7C). A possible  
479 explanation for this discrepancy lies in the different uptake conditions for these experiments.  
480 The [ $^{13}\text{C}$ ]-labelled amino acid uptake experiments were performed in medium containing a  
481 complex mix of amino acids, whereas [ $^{14}\text{C}$ ]Phe uptake was performed in medium containing  
482 L-Phe as the sole amino acid. Amino acids such as L-Tyr in the amino acid mix are likely to

483 compete with L-Phe for uptake by *TgApiAT5-3* in WT parasites. Notably, uptake of [<sup>14</sup>C]Tyr  
484 into oocytes expressing *TgApiAT5-3* was not impaired by the addition of equimolar amounts  
485 of unlabelled L-Phe (Fig S5A), indicating that *TgApiAT5-3* has a greater affinity for L-Tyr  
486 than L-Phe. If a transporter's affinity for L-Tyr is much greater than that for L-Phe, uptake of  
487 the latter will be minimal in conditions where the amino acids are present at similar  
488 concentrations (as we observed in the oocyte experiments, and as appears to be the case in  
489 mammalian cells (32)). This is consistent with the hypothesis that *TgApiAT5-3* plays little  
490 role in L-Phe uptake in the parasite. Instead, L-Phe is likely to be taken up via alternative  
491 transport pathways (Fig 9).

492 The importance of *TgApiAT5-3* for L-Trp uptake in *T. gondii* is less clear. We were unable  
493 to detect the uptake of either [<sup>13</sup>C]Trp or [<sup>14</sup>C]Trp in parasites under different experimental  
494 conditions. In oocyte experiments, L-Trp can effectively out-compete L-Tyr for uptake via  
495 *TgApiAT5-3* when present in equimolar amounts (Fig S5A), suggesting that *TgApiAT5-3*  
496 has similar affinities for L-Trp and L-Tyr. We observed a defect in growth of  $\Delta$ *apiAT5-3*  
497 parasites at low concentrations of L-Trp in the growth medium (below ~16  $\mu$ M; Fig 8C),  
498 suggesting that *TgApiAT5-3* may have a role in the uptake of L-Trp at low concentrations.  
499 The estimated plasma concentration of L-Trp in humans and mice is ~60  $\mu$ M (33), a  
500 concentration at which  $\Delta$ *apiAT5-3* parasites grow optimally *in vitro* (Fig 8C). However, *T.*  
501 *gondii* infection leads to an interferon  $\gamma$  (IFN $\gamma$ ) response in the host organism, which activates  
502 the L-Trp-degrading enzyme indoleamine 2,3-dioxygenase, leading to lowered serum levels  
503 of L-Trp and decreased parasite growth (21, 35). *TgApiAT5-3* may, therefore, become  
504 important for L-Trp uptake following the IFN $\gamma$  response upon parasite infection *in vivo* (Fig  
505 9). Examining the importance of *TgApiAT5-3* for L-Trp uptake upon IFN $\gamma$  stimulation will  
506 be of particular interest for understanding the interplay between transporter function and the  
507 host response to parasite infection.

508 *ΔapiAT5-3* parasites are capable of growth when the concentration of L-Tyr in the growth  
509 medium is  $\geq 1$  mM (Fig 8A). This indicates the existence of an alternative L-Tyr uptake  
510 pathway that takes up sufficient L-Tyr to enable parasite growth when L-Tyr levels are high  
511 (Fig 9). By contrast, *ΔapiAT5-3* parasites grew normally at intermediate concentrations of L-  
512 Phe (78 – 625  $\mu$ M) and L-Trp (31 – 250  $\mu$ M), but exhibited a dramatic decrease in growth at  
513 higher concentrations of both these amino acids (Fig 8B-C). These observations are  
514 consistent with the hypothesis that the alternative L-Tyr uptake pathway(s) also functions in  
515 L-Phe and L-Trp uptake (Fig 9). At high concentrations of L-Phe and L-Trp, uptake of L-Tyr  
516 by this alternative pathway(s) is inhibited by competition with the other aromatic amino  
517 acids, preventing parasite growth in the absence of *TgApiAT5-3*. This mirrors similar  
518 observations in our previous study on the alternative L-Arg uptake pathway in the parasite, in  
519 which we showed that high levels of other cationic amino acids inhibit parasite growth in the  
520 absence of the selective L-Arg transporter (5).

521 We propose a model whereby the uptake of L-Tyr into *T. gondii* parasites is mediated  
522 primarily by *TgApiAT5-3* (Fig 9). The uptake of L-Phe and L-Trp is mediated primarily by  
523 one or more alternative aromatic amino acid transporters. These transporters can also  
524 transport L-Tyr, and compensate for loss of *TgApiAT5-3* when L-Tyr levels are high and  
525 corresponding levels of L-Phe and L-Trp are lower (Fig 9). *TgApiAT5-3* has an additional  
526 role in facilitating homeostasis of these aromatic amino acids and large neutral amino acids  
527 (Fig 9).

528 This model is based on our observations of tachyzoite stage parasites. A recent study  
529 examined *T. gondii* aromatic amino acid hydroxylase enzymes, which can interconvert L-Phe  
530 and L-Tyr (36). Knockout of these enzymes revealed that they are not required for tachyzoite  
531 growth, but are particularly important for producing oocysts following the sexual stages of  
532 the parasite life cycle that occur in the felid hosts (36). Given the differences in aromatic

533 amino acid metabolism between tachyzoite and oocyst stages of the life cycle, it is likely that  
534 the nature and requirements for aromatic amino acid transporters differs across the life cycle  
535 of the parasite. Future studies that investigate the expression and importance of *TgApiAT5-3*  
536 and other aromatic amino acid transporters (perhaps other members of the *TgApiAT5* family)  
537 across the entire life cycle will be of particular interest.

538 In this manuscript, we describe an apicomplexan-specific family of plasma membrane  
539 transporters that appear to be primarily involved in amino acid uptake. Our findings highlight  
540 the evolutionary novelties that must arise to enable parasites to scavenge essential nutrients  
541 from their hosts, and also highlight the importance of amino acid scavenging for the growth  
542 and virulence of the disease-causing tachyzoite stage *T. gondii*. Future studies that examine  
543 the role of other members of this transporter family across the entire life cycle of the parasite  
544 will facilitate a better understanding of how these parasites acquire amino acids from their  
545 hosts.

546

## 547 **Materials and Methods**

### 548 **Phylogenetic analysis of the ApiAT protein family**

549 Reciprocal protein BLAST searches in [www.eupathdb.org](http://www.eupathdb.org) were used to identify orthologues  
550 of the five previously identified *Plasmodium falciparum* ApiAT genes in the genomes of the  
551 apicomplexans *Plasmodium berghei*, *Toxoplasma gondii*, *Cryptosporidium parvum*, *Eimeria*  
552 *tenella*, *Neospora caninum*, *Babesia bovis* and *Theileria annulata*, and the chromerids  
553 *Chromera velia* and *Vitrella brassicaformis*. Gene IDs are listed in Table S3.

554 The sequences of the 67 identified ApiAT proteins were aligned using ClustalX 2.1. The  
555 multiple sequence alignment was edited in Jalview ([www.jalview.org](http://www.jalview.org)) to remove poorly  
556 aligned blocks. After sequence editing, 452 residues were left for subsequent phylogenetic



557 analysis using PHYLIP v3.69 ([evolution.genetics.washington.edu/phylip/getme.html](http://evolution.genetics.washington.edu/phylip/getme.html)) as  
558 described previously (37). Briefly, a consensus maximum likelihood tree and bootstrap  
559 values were generated by running the alignment file through the ‘seqboot’ program, which  
560 was used to generate 1000 pseudosamples of the alignment. Next, multiple phylogenetic trees  
561 were generated from the pseudosamples using the ‘proml’ tree algorithm, using a randomised  
562 order of entry and three jumbles. Finally, the multiple phylogenetic trees were converted to a  
563 consensus tree with bootstrap values using the program ‘consense’. Trees were viewed using  
564 the program FigTree (<http://tree.bio.ed.ac.uk/software/figtree/>) and annotated using Inkscape  
565 (<https://inkscape.org/en>). For visual representation of the alignment, shading for sequence  
566 identity was carried out using the TexShade package for LaTeX, using similarity mode with  
567 the ‘\fingerprint’ command (<https://ctan.org/pkg/texshade?lang=en>).

568

## 569 **Parasite culture**

570 Parasites were maintained in human foreskin fibroblasts (HFFs; a kind gift from Holger  
571 Schülter, Peter MacCallum Cancer Centre) cultured at 37°C in a humidified 5 % CO<sub>2</sub>  
572 incubator. Unless otherwise noted, parasites were cultured in Dulbecco’s modified Eagle’s  
573 medium (DMEM) supplemented with 1 % (v/v) fetal calf serum and antibiotics. ‘Homemade’  
574 media were generated as described previously (5), with amino acids at the concentrations  
575 found in DMEM, or modified as specified in the text.  $\Delta$ *apiAT5-3* parasites were grown  
576 continuously in DMEM supplemented with 2.5 mM L-Tyr. TATi (38), TATi/Tomato,  
577 TATi/ $\Delta$ *ku80* (39), and RH $\Delta$ *hxgprt*/Tomato (22) parasites were used as parental strains for the  
578 genetically modified parasites generated in this study.

579

## 580 **Generation of genetically modified *T. gondii* parasites**

581 Guide RNA (gRNA)-encoding sequences specific to target genes were introduced into the  
582 vector pSAG1::Cas9-U6::sgUPRT (Addgene plasmid # 54467; (18)) using Q5 site-directed  
583 mutagenesis (New England Biolabs) as described previously (18). A list of the forward  
584 primers used to generate gRNA-expressing vectors for introducing frame-shift mutations are  
585 described in Table S4. In each instance, the reverse primer 5'-  
586 AACTTGACATCCCCATTTAC was used. For generating 'knockout' frameshift mutations  
587 in *TgApiAT* genes, gRNAs were designed to target the open reading frames of *TgApiAT*  
588 genes, and transfected into parasites on a vector that also expressed Cas9-GFP. Transfections  
589 were performed as described previously (40). GFP positive parasites were selected and  
590 cloned using flow cytometry 2-3 days following transfection using a FACSAria I or  
591 FACSAria II cell sorter (BD Biosciences). The region of the candidate genes targeted by the  
592 gRNAs were sequenced in clonal parasites, and clones in which the target gene had been  
593 disrupted by a frameshift mutation or insertion of a premature stop codon (i.e. where the open  
594 reading frame was disrupted) were selected for subsequent analyses. For 3' replacements,  
595 gRNAs were selected to target a region near the stop codon of the gene of interest, using the  
596 primers listed in Table S5. In addition, a donor DNA sequence encoding a 3x HA tag was  
597 amplified by PCR to contain 50 bp of flanking sequences homologous to the target gene  
598 either side of the stop codon. Template DNA encoding the 3x HA tag was generated as a  
599 gBlock (Integrated DNA Technologies), with the sequence listed in Table S6. Forward and  
600 reverse primers used to amplify the HA tag for each target gene are also listed in Table S6.  
601 gRNA-expressing vectors, which simultaneously encode Cas9 fused to GFP, were co-  
602 transfected into *T. gondii* parasites with the donor DNA sequence. 2-3 days after transfection,  
603 GFP-Cas9-expressing parasites were selected and cloned into wells of a 96-well plate by flow  
604 cytometry as described above.

605 3' replacement plasmids were created to epitope tag *TgApiAT2*, *TgApiAT3-2*, *TgApiAT3-3*,  
606 *TgApiAT5-3*, *TgApiAT6-1*, *TgApiAT6-2* and *TgApiAT7-1* using conventional crossover  
607 recombination methods as described previously (41). Regions of DNA homologous to the 3'  
608 ends of the genes were amplified by PCR using primers described in Table S7, and ligated  
609 into the *Bgl*III and *Avr*II sites of the vector pgCH (5) or the *Pac*I and *Avr*II sites of pLIC-HA<sub>3</sub>-  
610 DHFR (41). Resulting plasmids were linearized in the flanking sequence using restriction  
611 enzymes (Table S7), then transfected into TATi/ $\Delta ku80$  parasites. Parasites were selected on  
612 chloramphenicol or pyrimethamine as described (40). In cases where we were unable to  
613 subsequently detect protein of approximately the expected molecular mass by western  
614 blotting, we confirmed correct integration of the HA tag by sequencing of CRISPR-modified  
615 3' ends (*TgApiATs* 5-1, 5-2, 5-4, 5-5 and 5-6; not shown), or by PCR screening (*TgApiAT7*-  
616 1). For assessing HA integration into the *TgApiAT7-1* locus, DNA was extracted from  
617 *TgApiAT7-1*-HA parasite clones, and used as template in a PCR with the primers 5'-  
618 GGCGAAGAGAAGGCGTTG and 5'-GTCATCCCTTTTCTTCGATAA, with the presence  
619 of a 2.5 kb band indicative of successful integration (Fig S3C).

620 To complement the  $\Delta apiAT2$  mutant with a constitutively-expressed copy of *TgApiAT2*, we  
621 amplified the open reading frame of *TgApiAT2* from genomic DNA with the primers 5'-  
622 GATCGGATCCAAAATGGCGGCTGCTCAG and 5'-  
623 GATCCCTAGGCACAGCGACCTCTGGACTCGGT. We digested the resultant PCR  
624 product with *Bam*HI and *Avr*II and ligated this into the *Bgl*III and *Avr*II sites of the pUgCTh<sub>3</sub>  
625 vector (5). The resultant vector was linearised with *Mfe*I, transfected into  $\Delta apiAT2$  parasites  
626 and selected on chloramphenicol. To complement the  $\Delta apiAT5-3$  mutant with a  
627 constitutively-expressed copy of *TgApiAT5-3*, we amplified the open reading frame of  
628 *TgApiAT5-3* with the primers 5'-  
629 GATCGGATCCAAAATGGAGTCGACCGAGGCGACTAT and 5'-

630 GATCCCTAGGCAGCACCTTCGGGACTTTTCTCTTC, using the *Tg*ApiAT5-3-  
631 expressing oocyte vector (described below) as template. We digested the resultant PCR  
632 product with *Bam*HI and *Avr*II and ligated this into the *Bgl*III and *Avr*II sites of the pUgCTH<sub>3</sub>  
633 vector. The resultant vector was linearised with *Mfe*I, transfected into  $\Delta$ *apiAT5-3* parasites  
634 and selected on chloramphenicol.

635

### 636 **Immunofluorescence assays and western blotting**

637 Immunofluorescence assays and western blotting were performed as described previously (5).  
638 For western blotting, membranes were probed with rat anti-HA antibodies (clone 3F10,  
639 Sigma) at dilutions between 1:1,000 to 1:3,000, mouse anti-GRA8 (a kind gift from Gary  
640 Ward, U. Vermont, (42)) at a dilution of 1:80,000, or rabbit anti-*Tg*Tom40 antibodies (43) at  
641 1:2,000 dilution, and horseradish peroxidase (HRP)-conjugated goat anti-rat (sc-2006, Santa  
642 Cruz Biotechnology), HRP-conjugated goat anti-mouse (sc-2005, Santa Cruz  
643 Biotechnology), or HRP-conjugated goat anti-rabbit (sc-2004, Santa Cruz Biotechnology)  
644 antibodies at dilutions of 1:5,000 to 1:10,000.

645 For immunofluorescence assays, samples were probed with the following primary antibodies:  
646 rat anti-HA (clone 3F10, Sigma) at a 1:200 dilution, mouse anti-P30 (clone TP3, Abcam) at a  
647 1:2,000 dilution, rabbit anti-P30 (a kind gift from John Boothroyd, Stanford U) at dilutions  
648 between 1:25,000 and 1:90,000, or rabbit anti-GFP (a kind gift from Alex Maier, ANU) at a  
649 1:200 dilution. Samples were next probed with the following secondary antibodies: CF488A-  
650 conjugated goat anti-rat (SAB4600046, Sigma) at a dilution of 1:500, AlexaFluor 488-  
651 conjugated goat anti-rat (4416, Cell Signaling Technology) at dilution of 1:250,  
652 AlexaFluor488-conjugated goat anti-rabbit (A11008, Life Technologies) at a dilution of 1:500,  
653 AlexaFluor546-conjugated goat anti-rabbit (A11035, Life Technologies) at a dilution of 1:500,

654 AlexFluor546-conjugated goat anti-mouse (A11030, Life Technologies) at a dilution of  
655 1:500, or AlexFluor647-conjugated goat anti-mouse (A21236, Life Technologies) at a  
656 dilution of 1:500.

657 Fluorescence microscopy was performed on a DeltaVision Elite system (GE Healthcare)  
658 using an Olympus IX71 inverted microscope with a 100X UPlanSApo objective lens (NA  
659 1.40). Images were recorded using a CoolSNAP HQ2 camera. Images were deconvolved  
660 using SoftWoRx Suite 2.0 software, and images were linearly adjusted for contrast and  
661 brightness.

662

### 663 **Parasite growth and virulence assays**

664 To measure parasite growth by plaque assays, either 150 parasites were added to wells of a 6-  
665 well plate containing confluent HFFs, or 500-1,000 parasites were added to confluent HFFs  
666 in 25 cm<sup>2</sup> tissue culture flasks. Parasites were allowed to grow for 8 to 18 days before  
667 fixation and staining with crystal violet as described previously (40).

668 Fluorescence growth assays were performed as described previously (44, 45), with slight  
669 modifications. Briefly, wells of an optical bottom 96-well plate containing confluent HFFs  
670 were washed twice in medium lacking L-Tyr, L-Phe or L-Trp. Wells were filled with  
671 medium containing a range of L-Tyr, L-Phe or L-Trp concentrations. 2,000 parasites were  
672 inoculated into each of these wells, and plates were incubated at 37°C in a 5% CO<sub>2</sub> incubator.  
673 Well fluorescence was measured 5 days post-inoculation in a FluoStar Optima fluorescence  
674 plate reader (BMG Labtech), a time point at which WT parasites were in mid-logarithmic  
675 stage of growth. Relative growth was expressed as a percentage of the well fluorescence in  
676 the optimum amino acid concentration for WT or  $\Delta$ *apiAT5-3* parasites at this time point.

677 To measure parasite virulence, freshly egressed WT (RH $\Delta$ *hxgprt*/Tomato) or  $\Delta$ *apiAT5-3* in  
678 RH/ $\Delta$ *hxgprt*/Tomato parasites were filtered through a 3  $\mu$ m polycarbonate filter, washed once  
679 in phosphate-buffered saline (PBS), then were diluted to 10<sup>4</sup> parasites/ml in PBS. 10<sup>3</sup>  
680 parasites were injected intraperitoneally into 7-week-old, female Balb/c mice using a 26-  
681 gauge needle. Mice were weighed regularly, and monitored for symptoms of toxoplasmosis  
682 (weight loss, ruffled fur, lethargy and hunched posture). Mice exhibiting terminal symptoms  
683 of toxoplasmosis were euthanized in accordance with protocols approved by the Australian  
684 National University Animal Experimentation Ethics Committee (protocol number A2016/42).

685

#### 686 [<sup>13</sup>C]Amino acid labelling and detection.

687 Freshly egressed WT or  $\Delta$ *apiAT5-3* tachyzoites (10<sup>8</sup>) were incubated in 500  $\mu$ L of amino  
688 acid-free Roswell Park Memorial Institute 1640 medium supplemented with 2 mg/ml algal  
689 [<sup>13</sup>C]amino acid mix (Cambridge Isotope Laboratories) for 15 minutes at 37°C in a 5% CO<sub>2</sub>  
690 incubator. [<sup>13</sup>C]amino acid labelling was terminated by rapid dilution in 14 ml of ice cold  
691 PBS. Parasite metabolites were extracted in chloroform:methanol:water (1:3:1 v/v/v)  
692 containing 1 nmol *scyllo*-inositol (Sigma). The aqueous phase metabolites were dried in a  
693 heated speedvac concentrator, methoxymated by treatment with 20 mg/ml methoxyamine in  
694 pyridine overnight, then trimethylsilylated by treatment with N,O-  
695 bis(trimethylsilyl)trifluoroacetamide containing 1% trimethylsilyl for 1 hr at room  
696 temperature. Samples were analyzed using GC-MS as described previously (46). The  
697 fractional labelling of all detected amino acids was estimated as the fraction of the metabolite  
698 pool containing one or more <sup>13</sup>C-atoms after correction for natural abundance. Total  
699 metabolite counts were normalized to *scyllo*-inositol as an internal standard.

700

701 ***Xenopus laevis* oocyte preparation and *TgApiAT5-3* expression.**

702 The open reading frame of *TgApiAT5-3* was amplified from RH $\Delta$ *hxprt* strain cDNA  
703 template using the primers 5'-  
704 GATCACCGGTCCACCATGGAGTCGACCGAGGCGACTAT and 5'-  
705 GATCCCTAGGCAGCACCTTCGGGACTTTTCTCTTC. The resultant product was  
706 digested with *AgeI* and *AvrII*, and ligated into the *XmaI* and *AvrII* sites of the vector pGHJ-  
707 HA (5). The plasmid was linearised by incubation in *NotI* overnight, and complementary  
708 RNA (cRNA) encoding HA-tagged *TgApiAT5-3* was prepared for injection into oocytes as  
709 previously described (47-49). *Xenopus laevis* oocytes were surgically removed and prepared  
710 for cRNA injection as described (48). For all transporter assays in oocytes, 15 ng of  
711 *TgApiAT5-3* cRNA was micro-injected into stage 5 or 6 oocytes using a Micro4<sup>TM</sup> micro-  
712 syringe pump controller and A203XVY nanoliter injector (World Precision Instruments).  
713 Maintenance of animals and preparation of oocytes was approved by the Australian National  
714 University Animal Experimentation Ethics Committee (protocol number A2014/20).

715

716 **Oocyte surface biotinylation and whole membrane preparation.**

717 Oocyte surface biotinylation and whole membrane preparations were performed as described  
718 previously (48, 50). Briefly, for surface biotinylation, 15 oocytes were selected 3-6 days post  
719 cRNA injection, washed thrice in ice-cold PBS (pH 8.0), incubated for 45 mins at room  
720 temperature in 0.5 mg/ml of EZ-Link<sup>TM</sup> Sulfo-NHS-LC-Biotin (Thermo Fisher Scientific),  
721 and then washed thrice more in ice-cold PBS. Oocytes were subsequently solubilised in  
722 oocyte lysis buffer (20 mM Tris-HCl pH 7.6, 150 mM NaCl, 1% v/v Triton X-100) for 2  
723 hr on ice. Samples were centrifuged at 16,000 g, and the supernatant was mixed with 50  $\mu$ l of  
724 streptavidin-coated agarose beads (Thermo Fisher Scientific). The mixture was incubated at  
725 4°C on slow rotation overnight. Beads were washed 4 times with oocyte lysis buffer before

726 elution in SDS-PAGE sample buffer. For whole membrane preparation, 10-25 oocytes were  
727 homogenised by trituration in homogenisation buffer (50 mM Tris-HCl pH 7.4, 100 mM  
728 NaCl, 1 mM EDTA, protease inhibitors). Homogenised oocytes were centrifuged at 2,000 g  
729 for 10 min at 4 °C and the resulting supernatant further centrifuged for 30 min at 140,000 g at  
730 4°C. The resulting pellet was washed with homogenisation buffer and solubilised in  
731 homogenisation buffer containing 4 % (w/v) SDS, and then in SDS-PAGE sample buffer.  
732 Protein samples from surface biotinylation and whole membrane preparations were separated  
733 by SDS-PAGE then detected by western blotting as described above.

734

### 735 **Oocyte uptake, efflux and electrophysiology**

736 For uptake experiments in either non-preloaded, preloaded, or pre-injected oocytes, batches  
737 of 10 oocytes were washed 4 times in ND96 buffer (96 mM NaCl, 2 mM KCl, 1 mM MgCl<sub>2</sub>,  
738 1.8 mM CaCl<sub>2</sub>, 5 mM HEPES, pH 7.4) at RT, and then incubated in the desired concentration  
739 of radiolabelled substrates as indicated in figure legends. For all substrate screening  
740 measurements, uptake was measured over 10 mins. For kinetic experiments, parallel batches  
741 of oocytes were preloaded with 0 – 1.78 mM L-Tyr, and uptake of [<sup>14</sup>C]Tyr at a range of L-  
742 Tyr concentrations was measured over 10 mins. For other uptake experiments, uptake was  
743 measured for the time-course indicated in the figures. Uptake was quenched by washing  
744 oocyte batches four times in ice-cold ND96.

745 For efflux experiments, batches of 5 oocytes/substrate were preloaded with [<sup>14</sup>C]L-amino  
746 acids as described below. Following preloading, oocytes were washed 4 times in ND96 and  
747 incubated in trans-stimulating substrates at concentrations described in the figure legends. To  
748 measure the amount of efflux, oocytes were incubated in 500 µl aliquots of the extracellular  
749 solution, of which 100 µl was removed for each time point and the efflux immediately  
750 quenched by washing oocytes in four times in ice-cold ND96. Oocyte retention was



751 measured by removing the oocytes following quenching of efflux. For the substrate efflux  
752 screen depicted in Fig 6B, the extracellular solution was sampled at 5 min to ensure initial  
753 rate measurements. For efflux experiments depicted in Fig 5C, efflux was measured for the  
754 time-course indicated in the figure.

755 Following all uptake and efflux experiments, oocytes or aliquots were distributed into  
756 OptiPlate96-well plates (Perkin-Elmer) and oocytes were lysed overnight in 10 % (w/v) SDS.  
757 150  $\mu$ l/well of Microscint-40 scintillation fluid (Perkin-Elmer) was added to the samples, and  
758 plates covered and shaken for 5 min before radioactivity was counted on a Perkin-Elmer  
759 MicroBeta<sup>2</sup> 2450 microplate scintillation counter.

760 All steady-state electrical recordings were made with an Axon GeneClamp 500B amplifier  
761 (Axon Instruments) in a two-voltage clamp configuration as previously described (50, 51).  
762 Voltage clamp was set to  $-50$  mV or  $0$  mV and data were sampled at  $3$  Hz using pClamp 8.2  
763 software (Axon Instruments). Boron silicate microelectrodes capillaries (World Precision  
764 Instruments) with a tip resistance of:  $1.5 \geq R_e \geq 0.5$  M $\Omega$  were pulled by a P-97  
765 Flaming/Brown micropipette puller (Sutter Instruments) and filled with  $3$  M KCl. Silver  
766 microelectrodes were coated using a  $5$  M NaCl single-chamber galvanic cell to form AgCl<sub>2</sub>  
767 electrodes. The membrane potential was adjusted digitally in voltage-clamp mode between  $0$   
768 and  $-50$  mV. Oocytes were chosen for recording when they had a resting membrane  
769 potential  $-25$  mV  $< E_m < -45$  mV. ND96 (pH 7.4) was used as the control solution for all  
770 electrophysiological recordings. Assay buffer pH was varied by mixing different ratios of  
771 acidic ND96 (pH 3.6) ( $5$  mM MES instead of HEPES) with basic ND96 (pH 10) ( $5$  mM Tris  
772 instead of HEPES).

773

774 **Oocyte preloading and pre-injection of trans-substrates.**

775 For uptake experiments measuring *trans*-stimulation by a range of amino acids and other  
776 metabolites (Fig 6A and Fig S5B), all L-amino acids substrates and metabolite mixes, except  
777 for L-Tyr, were pre-injected at 25 nl/oocyte using a Micro4<sup>TM</sup> micro-syringe pump controller  
778 and A203XVY nanoliter injector (World Precision Instruments). All pre-injected oocytes  
779 were incubated on ice for 30 mins prior to uptake experiments. Stock solutions containing  
780 100 mM L-amino acids in ND96 were pre-injected to give a calculated cytosolic  
781 concentration of 5 mM, based on an assumed free aqueous volume of 500 nl/oocyte . Stage 5  
782 or 6 oocytes diameters vary significantly from 1–1.3 mm and free aqueous oocyte volumes  
783 measured from 368 to > 500 nl (52, 53). Therefore, calculations of cytosolic concentrations  
784 from pre-injection should be treated as approximations only. In Fig. S5B, pre-injection of  
785 different metabolite groups was conducted to give estimated final concentrations of each  
786 metabolite as indicated in Table S2. The low solubility of L-Tyr in aqueous solutions (0.453  
787 g/L at 25°C, pH 7.4; (54)) necessitated preloading, rather than pre-injecting, substrate for  
788 *trans*-stimulation and efflux substrate specificity experiments. L-Tyr solutions were made by  
789 dissolving 2.5 mM L-Tyr in ND96 at 37°C and performing dilutions in ND96 to the required  
790 concentrations. Pre-loading of L-tyrosine in *TgApiAT5-3*-injected oocytes was tested by  
791 timing the pre-loading of 2.5 or 1 mM [<sup>14</sup>C]Tyr (data not shown). L-tyrosine equilibrium was  
792 reached after 10 to 12 hr, while uninjected oocytes reached a similar cytosolic concentration  
793 after incubation of approximately 68-72 hr. As a consequence, L-Tyr was preloaded for 32 hr  
794 in *TgApiAT5-3* injected oocytes and for 72 hr in uninjected oocytes for all *trans*-stimulation  
795 experiments. Greater than 90% of [<sup>14</sup>C]Tyr was effluxed from oocytes preloaded with 2.5  
796 mM labelled L-Tyr, indicating L-Tyr is not significantly metabolised during the preloading  
797 times used in experiments (data not shown).

798 All efflux substrate screening with [<sup>14</sup>C]labelled amino acids (Fig 6B) were conducted by  
799 preloading [<sup>14</sup>C]labelled L-amino acids for 3 hr prior to uptake. [<sup>14</sup>C]Tyr was preloaded at a

800 concentration of 2.5 mM, while the other [ $^{14}\text{C}$ ]labelled L-amino acids were preloaded at a  
801 concentration of 5 mM. Calculation of the pre-loaded [ $^{14}\text{C}$ ]labelled L-amino acids  
802 concentrations were conducted using a control set of oocytes for each substrate, pre-loaded in  
803 parallel to those used for efflux *trans*-stimulation. Calculations were made assuming a  
804 cytosolic volume of 500 nl/oocyte.

805

### 806 **Oocyte data analysis and statistics.**

807 All oocyte data were analyzed using OriginPro (2015). All data displayed in figures represent  
808 the mean  $\pm$  S.D. except where otherwise indicated. Unless uptake data from uninjected  
809 oocytes is included in figures, uptake in uninjected oocytes was subtracted from uptake in  
810 *TgApiAT5-3*-injected oocytes to give the '*TgApiAT5-3*-mediated uptake'. All data sets were  
811 analysed for Gaussian normalcy by first running a Shapiro-Wilk test prior to analysis and  
812 used only if passing the normalcy test at the  $P < 0.05$  level. Multi-variant experiments with 3  
813 or more experimental conditions were subjected to a one-way ANOVA with Dunnet's post-  
814 hoc test and significance tested at the  $P < 0.05$  level.

815 .

816 Time-course analysis of uptake and oocyte retention data of L-Tyr in *TgApiAT5-3*-injected  
817 oocytes were fitted to 1<sup>st</sup> order integrated rate equations:

$$818 \quad S_t = S_0 e^{-kt} \quad (\text{eq. 1, retention})$$

819 Or:

$$820 \quad S_t = S_{max}(1 - e^{-kt}) \quad (\text{eq. 2, uptake})$$

821 Equation 2 being the Box Lucas 1 model with zero offset (55), where  $S_t$ , and  $S_0$ , and are the  
822 amount of substrate (S) at variable time (t), or when  $t = 0$ ,  $S_{max}$  is the vertical asymptote of  
823 substrate amount, and k is the 1<sup>st</sup> order rate constant.

824 Steady-state kinetic data collected under initial rate conditions were fitted to both the  
825 Michaelis-Menten equation:

$$826 \quad v = \frac{V_{max} \cdot [S]}{K_{0.5} + [S]} \quad (\text{eq. 3})$$

827 And a Scatchard linear regression equation:

$$828 \quad \frac{v}{[S]} = \frac{V_{max}}{K_{0.5}} - \frac{v}{K_{0.5}} \quad (\text{eq. 4})$$

829 In the Scatchard regression, the apparent Michaelis constant ( $K_{0.5}$ ) is derived from the slope  
830 ( $1/K_{0.5}$ ) and the maximal rate ( $V_{max}$ ) from the ordinate intercept ( $V_{max}/K_{0.5}$ ).

831 All curve fittings were evaluated using adjusted  $R^2$  values as indicated in the text and figure  
832 legends. All non-linear fitting was conducted using the Levenburg-Marquardt algorithm, with  
833 iteration numbers varying from 4 to 11 before convergence was attained.

834

### 835 ***T. gondii* amino acid assays**

836 Amino acid uptake assays were carried out as described previously (5), with slight  
837 modifications. Briefly, extracellular parasites were washed twice in Dulbecco's PBS pH 7.4  
838 (Sigma) supplemented with 10 mM glucose (PBS-glucose). Parasites were incubated in PBS-  
839 glucose containing radiolabelled amino acids, and 200  $\mu$ l aliquots removed at regular time  
840 points. Parasite samples were centrifuged through an oil mix to separate parasites from  
841 unincorporated radiolabel as described previously (5). L-Arg uptake was measured by  
842 incubation in 0.1  $\mu$ Ci/mL [ $^{14}$ C]Arg and 100  $\mu$ M L-Arg, L-Tyr uptake was measured by  
843 incubation in 0.25  $\mu$ Ci/mL [ $^{14}$ C]Tyr and 60  $\mu$ M L-Tyr, and L-Phe uptake was measured by  
844 incubation in 0.1  $\mu$ Ci/mL [ $^{14}$ C]Phe and 15  $\mu$ M L-Phe. The time courses of radiolabel uptake

845 in each amino acid tested were fitted by a single exponential function and the initial rate of  
846 transport was estimated from the initial slope of the fitted line.

847

#### 848 **Acknowledgements**

849 We are grateful to students from the 2016 Biology of Parasitism course (Woods Hole, MA)  
850 for performing some of the early studies to characterise the role of *Tg*ApiAT5-3 in aromatic  
851 amino acid transport. We thank Harpreet Vohra and Michael Devoy for performing flow  
852 cytometry.

## 853 **References**

- 854 1. Striepen B. Parasitic infections: Time to tackle cryptosporidiosis. *Nature*.  
855 2013;503(7475):189-91.
- 856 2. Montoya JG, Liesenfeld O. Toxoplasmosis. *Lancet*. 2004;363(9425):1965-76.
- 857 3. Kirk K, Lehane AM. Membrane transport in the malaria parasite and its host erythrocyte.  
858 *Biochem J*. 2014;457(1):1-18.
- 859 4. Kenthirapalan S, Waters AP, Matuschewski K, Kooij TW. Functional profiles of orphan  
860 membrane transporters in the life cycle of the malaria parasite. *Nat Commun*. 2016;7:10519.
- 861 5. Rajendran E, Hapuarachchi SV, Miller CM, Fairweather SJ, Cai Y, Smith NC, et al. Cationic  
862 amino acid transporters play key roles in the survival and transmission of apicomplexan parasites.  
863 *Nat Commun*. 2017;8:14455.
- 864 6. Martin RE, Henry RI, Abbey JL, Clements JD, Kirk K. The 'permeome' of the malaria parasite:  
865 an overview of the membrane transport proteins of *Plasmodium falciparum*. *Genome Biol*.  
866 2005;6(3):R26.
- 867 7. Boisson B, Lacroix C, Bischoff E, Gueirard P, Bargieri DY, Franke-Fayard B, et al. The novel  
868 putative transporter NPT1 plays a critical role in early stages of *Plasmodium berghei* sexual  
869 development. *Mol Microbiol*. 2011;81(5):1343-57.
- 870 8. Behnke MS, Khan A, Sibley LD. Genetic mapping reveals that sinefungin resistance in  
871 *Toxoplasma gondii* is controlled by a putative amino acid transporter locus that can be used as a  
872 negative selectable marker. *Eukaryot Cell*. 2015;14(2):140-8.
- 873 9. Aurecochea C, Barreto A, Brestelli J, Brunk BP, Cade S, Doherty R, et al. EuPathDB: the  
874 eukaryotic pathogen database. *Nucleic Acids Res*. 2013;41(Database issue):D684-91.
- 875 10. Moore RB, Obornik M, Janouskovec J, Chrudimsky T, Vancova M, Green DH, et al. A  
876 photosynthetic alveolate closely related to apicomplexan parasites. *Nature*. 2008;451(7181):959-63.
- 877 11. Coordinators NR. Database Resources of the National Center for Biotechnology Information.  
878 *Nucleic Acids Res*. 2017;45(D1):D12-D7.
- 879 12. Finn RD, Clements J, Eddy SR. HMMER web server: interactive sequence similarity searching.  
880 *Nucleic Acids Res*. 2011;39(Web Server issue):W29-37.
- 881 13. Bodoy S, Fotiadis D, Stoeger C, Kanai Y, Palacin M. The small SLC43 family: facilitator system I  
882 amino acid transporters and the orphan EEG1. *Mol Aspects Med*. 2013;34(2-3):638-45.
- 883 14. Pao SS, Paulsen IT, Saier MH, Jr. Major facilitator superfamily. *Microbiol Mol Biol Rev*.  
884 1998;62(1):1-34.
- 885 15. Reddy VS, Shlykov MA, Castillo R, Sun EI, Saier MH, Jr. The major facilitator superfamily  
886 (MFS) revisited. *FEBS J*. 2012;279(11):2022-35.
- 887 16. Sonnhammer EL, von Heijne G, Krogh A. A hidden Markov model for predicting  
888 transmembrane helices in protein sequences. *Proc Int Conf Intell Syst Mol Biol*. 1998;6:175-82.
- 889 17. Sangare LO, Alayi TD, Westermann B, Hovasse A, Sindikubwabo F, Callebaut I, et al.  
890 Unconventional endosome-like compartment and retromer complex in *Toxoplasma gondii* govern  
891 parasite integrity and host infection. *Nat Commun*. 2016;7:11191.
- 892 18. Shen B, Brown KM, Lee TD, Sibley LD. Efficient gene disruption in diverse strains of  
893 *Toxoplasma gondii* using CRISPR/CAS9. *MBio*. 2014;5(3):e01114-14.
- 894 19. Stein WDaL, W.R. Facilitated Diffusion: The Simple Carrier. *Transport and Diffusion across*  
895 *Cell Membranes*. Orlando, FLA, U.S.A.: ACADEMIC PRESS; 1986. p. 231-361.
- 896 20. Marino ND, Boothroyd JC. *Toxoplasma* growth in vitro is dependent on exogenous tyrosine  
897 and is independent of AAH2 even in tyrosine-limiting conditions. *Exp Parasitol*. 2017;176:52-8.
- 898 21. Pfefferkorn ER. Interferon gamma blocks the growth of *Toxoplasma gondii* in human  
899 fibroblasts by inducing the host cells to degrade tryptophan. *Proc Natl Acad Sci U S A*.  
900 1984;81(3):908-12.
- 901 22. Chtanova T, Schaeffer M, Han SJ, van Dooren GG, Nollmann M, Herzmark P, et al. Dynamics  
902 of neutrophil migration in lymph nodes during infection. *Immunity*. 2008;29(3):487-96.

- 903 23. Janouskovec J, Keeling PJ. Evolution: Causality and the Origin of Parasitism. *Curr Biol*.  
904 2016;26(4):R174-7.
- 905 24. van Dooren GG, Striepen B. The algal past and parasite present of the apicoplast. *Annu Rev*  
906 *Microbiol*. 2013;67:271-89.
- 907 25. Coppens I. Exploitation of auxotrophies and metabolic defects in *Toxoplasma* as therapeutic  
908 approaches. *Int J Parasitol*. 2014;44(2):109-20.
- 909 26. Sibley LD, Messina M, Niesman IR. Stable DNA transformation in the obligate intracellular  
910 parasite *Toxoplasma gondii* by complementation of tryptophan auxotrophy. *Proc Natl Acad Sci U S A*.  
911 1994;91(12):5508-12.
- 912 27. Tymoshenko S, Oppenheim RD, Agren R, Nielsen J, Soldati-Favre D, Hatzimanikatis V.  
913 Metabolic needs and capabilities of *Toxoplasma gondii* through combined computational and  
914 experimental analysis. *PLoS Comput Biol*. 2015;11(5):e1004261.
- 915 28. Foster C, Portman N, Chen M, Slapeta J. Increased growth and pigment content of *Chromera*  
916 *velia* in mixotrophic culture. *FEMS Microbiol Ecol*. 2014;88(1):121-8.
- 917 29. Kuo CH, Wares JP, Kissinger JC. The Apicomplexan whole-genome phylogeny: an analysis of  
918 incongruence among gene trees. *Mol Biol Evol*. 2008;25(12):2689-98.
- 919 30. Jackson AP, Otto TD, Aslett M, Armstrong SD, Bringaud F, Schlacht A, et al. Kinetoplastid  
920 Phylogenomics Reveals the Evolutionary Innovations Associated with the Origins of Parasitism. *Curr*  
921 *Biol*. 2016;26(2):161-72.
- 922 31. Sidik SM, Huet D, Ganesan SM, Huynh MH, Wang T, Nasamu AS, et al. A Genome-wide  
923 CRISPR Screen in *Toxoplasma* Identifies Essential Apicomplexan Genes. *Cell*. 2016;166(6):1423-35.
- 924 32. Bergstrom J, Furst P, Noree LO, Vinnars E. Intracellular free amino acid concentration in  
925 human muscle tissue. *J Appl Physiol*. 1974;36(6):693-7.
- 926 33. Cantor JR, Abu-Remaileh M, Kanarek N, Freinkman E, Gao X, Louissaint A, Jr., et al.  
927 Physiologic Medium Rewires Cellular Metabolism and Reveals Uric Acid as an Endogenous Inhibitor  
928 of UMP Synthase. *Cell*. 2017;169(2):258-72 e17.
- 929 34. Broer S, Broer A. Amino acid homeostasis and signalling in mammalian cells and organisms.  
930 *Biochem J*. 2017;474(12):1935-63.
- 931 35. Engin AB, Dogruman-Al F, Ercin U, Celebi B, Babur C, Bukan N. Oxidative stress and  
932 tryptophan degradation pattern of acute *Toxoplasma gondii* infection in mice. *Parasitol Res*.  
933 2012;111(4):1725-30.
- 934 36. Wang ZT, Verma SK, Dubey JP, Sibley LD. The aromatic amino acid hydroxylase genes AAH1  
935 and AAH2 in *Toxoplasma gondii* contribute to transmission in the cat. *PLoS Pathog*.  
936 2017;13(3):e1006272.
- 937 37. Foth BJ. Phylogenetic analysis to uncover organellar origins of nuclear-encoded genes.  
938 *Methods Mol Biol*. 2007;390:467-88.
- 939 38. Meissner M, Schluter D, Soldati D. Role of *Toxoplasma gondii* myosin A in powering parasite  
940 gliding and host cell invasion. *Science*. 2002;298(5594):837-40.
- 941 39. Sheiner L, Demerly JL, Poulsen N, Beatty WL, Lucas O, Behnke MS, et al. A systematic screen  
942 to discover and analyze apicoplast proteins identifies a conserved and essential protein import  
943 factor. *PLoS Pathog*. 2011;7(12):e1002392.
- 944 40. Striepen B, Soldati D. Genetic manipulation of *Toxoplasma gondii*. In: Weiss LD, Kim K,  
945 editors. *Toxoplasma gondii* The Model Apicomplexan - Perspectives and Methods. London: Elsevier;  
946 2007. p. 391-415.
- 947 41. Huynh MH, Carruthers VB. Tagging of endogenous genes in a *Toxoplasma gondii* strain  
948 lacking Ku80. *Eukaryot Cell*. 2009;8(4):530-9.
- 949 42. Carey KL, Donahue CG, Ward GE. Identification and molecular characterization of GRA8, a  
950 novel, proline-rich, dense granule protein of *Toxoplasma gondii*. *Mol Biochem Parasitol*.  
951 2000;105(1):25-37.
- 952 43. van Dooren GG, Yeoh LM, Striepen B, McFadden GI. The Import of Proteins into the  
953 Mitochondrion of *Toxoplasma gondii*. *J Biol Chem*. 2016;291(37):19335-50.

- 954 44. Gubbels MJ, Li C, Striepen B. High-throughput growth assay for *Toxoplasma gondii* using  
955 yellow fluorescent protein. *Antimicrob Agents Chemother.* 2003;47(1):309-16.
- 956 45. van Dooren GG, Tomova C, Agrawal S, Humbel BM, Striepen B. *Toxoplasma gondii* Tic20 is  
957 essential for apicoplast protein import. *Proc Natl Acad Sci U S A.* 2008;105(36):13574-9.
- 958 46. Blume M, Nitzsche R, Sternberg U, Gerlic M, Masters SL, Gupta N, et al. A *Toxoplasma gondii*  
959 Gluconeogenic Enzyme Contributes to Robust Central Carbon Metabolism and Is Essential for  
960 Replication and Virulence. *Cell Host Microbe.* 2015;18(2):210-20.
- 961 47. Fairweather SJ, Broer A, O'Mara ML, Broer S. Intestinal peptidases form functional  
962 complexes with the neutral amino acid transporter B<sup>0</sup>AT1. *Biochem J.* 2012;446(1):135-48.
- 963 48. Broer S. *Xenopus laevis* Oocytes. *Methods Mol Biol.* 2010;637:295-310.
- 964 49. Wagner CA, Friedrich B, Setiawan I, Lang F, Bröer S. The use of *Xenopus laevis* oocytes for  
965 the functional characterization of heterologously expressed membrane proteins. *Cell Physiol*  
966 *Biochem.* 2000;10(1-2):1-12.
- 967 50. Fairweather SJ, Broer A, Subramanian N, Tumer E, Cheng Q, Schmoll D, et al. Molecular basis  
968 for the interaction of the mammalian amino acid transporters B<sup>0</sup>AT1 and B<sup>0</sup>AT3 with their ancillary  
969 protein collectrin. *J Biol Chem.* 2015;290(40):24308-25.
- 970 51. Bohmer C, Broer A, Munzinger M, Kowalczyk S, Rasko JE, Lang F, et al. Characterization of  
971 mouse amino acid transporter B<sup>0</sup>AT1 (slc6a19). *Biochem J.* 2005;389(Pt 3):745-51.
- 972 52. Weber W. Ion currents of *Xenopus laevis* oocytes: state of the art. *Biochim Biophys Acta.*  
973 1999;1421(2):213-33.
- 974 53. Taylor MA, Smith LD. Accumulation of free amino acids in growing *Xenopus laevis* oocytes.  
975 *Dev Biol.* 1987;124(1):287-90.
- 976 54. Seidell A. Solubilities of Inorganic and Metal Organic Compounds: A Compilation of  
977 Quantitative Solubility Data from the Periodical Literature: Van Nostrand; 1941.
- 978 55. Box GEP, Lucas HL. Design of Experiments in Non-Linear Situations. *Biometrika.*  
979 1959;46(1/2):77-90.
- 980 56. Jackson AJ, Clucas C, Mamczur NJ, Ferguson DJ, Meissner M. *Toxoplasma gondii* Syntaxin 6 is  
981 required for vesicular transport between endosomal-like compartments and the Golgi complex.  
982 *Traffic.* 2013;14(11):1166-81.
- 983 57. Gold DA, Kaplan AD, Lis A, Bett GC, Rosowski EE, Cirelli KM, et al. The *Toxoplasma dense*  
984 granule proteins GRA17 and GRA23 mediate the movement of small molecules between the host  
985 and the parasitophorous vacuole. *Cell Host Microbe.* 2015;17(5):642-52.
- 986 58. Fröhlich KU. Sequence Similarity Presenter: a tool for the graphic display of similarities of  
987 long sequences for use in presentations. *Comput Appl Biosci.* 1994;10(2):179-83.

988

989



990 **Figure legends**

991

992 **Fig 1. Phylogenetic analysis of ApiAT family proteins.**

993 Consensus maximum likelihood tree of ApiAT family proteins. The tree was generated from  
994 a multiple sequence alignment of 67 putative ApiAT proteins from a range of apicomplexans  
995 and chromerids, with 452 residues used in the analysis. Bootstrap values are depicted by  
996 black circles (>90% support), white circles (70-90% support), or a pink circle (60% for a  
997 group consisting of *Cryptosporidium* and chromerid proteins). The tree is unrooted.  
998 Abbreviations: Bb, *Babesia bovis*; Cp, *Cryptosporidium parvum*; Cv, *Chromera velia*; Et,  
999 *Eimeria tenella*; Nc, *Neospora caninum*; Pb, *Plasmodium berghei*; Pf, *Plasmodium*  
1000 *falciparum*; Tg, *Toxoplasma gondii*; Tha, *Theileria annulata*; Vb, *Vitrella brassicaformis*.

1001

1002 **Fig 2. Expression and localization analysis of *T. gondii* ApiAT family proteins.**

1003 (A-E) Western blots with anti-HA antibodies to measure the expression and molecular mass  
1004 of tagged *Tg*ApiAT proteins in tachyzoites stages of the parasite. Western blots with  
1005 antibodies against GRA8 and Tom40 were used to test for the presence of protein in samples  
1006 where the HA-tagged *Tg*ApiAT protein was not detected. (F-I) Immunofluorescence assays  
1007 with anti-HA antibodies to determine the localisation of *Tg*ApiAT proteins (green). Samples  
1008 were co-labelled with antibodies against the plasma membrane marker P30 (red). *Tg*ApiAT3-  
1009 3-HA-expressing parasites were co-transfected with the trans-Golgi network (TGN) marker  
1010 Stx6-GFP (56), and labelled with anti-HA (red), anti-P30 (blue) and anti-GFP (green)  
1011 antibodies. All scale bars are 2  $\mu$ m.

1012

1013 **Fig 3. Genetic disruption of *T. gondii* ApiAT family proteins reveals the importance of**  
1014 ***TgApiAT2* and *TgApiAT5-3* for parasite growth *in vitro*.**

1015 (A-F) Plaque assays depicting growth of *TgApiAT* knockout strains and their corresponding  
1016 parental WT strain. 150 parasites were added to wells of a 6-well plate and cultured for 9  
1017 days in DMEM g5ies(unless otherwise indicated). (A) WT (RH $\Delta$ *hxpgrt*) and  $\Delta$ *apiAT1*  
1018 parasites grown in DMEM (left) or RPMI (right). (B) WT (TATi/Tomato),  $\Delta$ *apiAT2* and  
1019  $\Delta$ *apiAT2* parasites complemented with a constitutively expressed *TgApiAT2*  
1020 (*cTgApiAT2*/ $\Delta$ *apiAT2*). (C) WT (TATi) and  $\Delta$ *apiAT3* sub-family mutants. (D) WT  
1021 (TATi/Tomato) and  $\Delta$ *apiAT5* sub-family mutants. (E) WT (TATi/Tomato) and  $\Delta$ *apiAT6* sub-  
1022 family mutants. (F)  $\Delta$ *apiAT7* sub-family mutants. Note that the TATi/Tomato strain served as  
1023 WT strain for the  $\Delta$ *apiAT2*,  $\Delta$ *apiAT5*,  $\Delta$ *apiAT6*, and  $\Delta$ *apiAT7* sub-family mutants, and the  
1024 identical image of the TATi/Tomato plaque assay is shown in B, D and E to facilitate  
1025 interpretation of the data. All images are from the same experiment, and are representative of  
1026 three independent experiments.

1027

1028 **Fig 4. Analysis of [<sup>13</sup>C] amino acid uptake into WT and  $\Delta$ *apiAT5-3* parasites reveals a**  
1029 **role for *TgApiAT5-3* in amino acid homeostasis.**

1030 (A-B) Extracellular WT or  $\Delta$ *apiAT5-3* tachyzoites were incubated in medium containing  
1031 [<sup>13</sup>C]-L-amino acids for 15 min. Polar metabolites were extracted and amino acid abundance  
1032 (A) and levels of [<sup>13</sup>C]-amino acid enrichment (B) in WT (black) and  $\Delta$ *apiAT5-3* (red)  
1033 tachyzoites determined by GC-MS. Only L-amino acids that could be detected in all  
1034 experiments are shown. The data are averaged from three independent experiments and error  
1035 bars represent  $\pm$  s.e.m. (\*, P < 0.05; \*\*, P < 0.01; \*\*\*, P < 0.001, \*\*\*\*, P < 0.0001; Student's

1036 *t* test. Where significance values are not shown, the differences were not significant;  $P >$   
1037 0.05).

1038

1039 **Fig 5. *TgApiAT5-3* is an L-tyrosine transporter that is stimulated by the presence of L-**  
1040 **tyrosine on the *trans* side of the membrane.**

1041 (A) Time course for the uptake of [<sup>14</sup>C]Tyr into *X. laevis* oocytes expressing *TgApiAT5-3*  
1042 (squares) or into uninjected oocytes (circles). Uptake was measured in the presence of 1 mM  
1043 L-Tyr. Each data point represents the mean uptake in 10 oocytes from a single experiment  $\pm$   
1044 standard deviation, and the data are representative of 3 independent experiments. A first order  
1045 rate equation was fitted to each time course ( $R^2 = 0.97$  for *TgApiAT5-3*-expressing oocytes  
1046 and  $R^2 = 0.77$  for uninjected controls). Both the rate constant for [<sup>14</sup>C]Tyr uptake and the  
1047 maximal [<sup>14</sup>C]Tyr uptake measured in *TgApiAT5-3*-expressing oocytes were significantly  
1048 higher than those measured in uninjected oocytes ( $P < 0.01$ , Student's *t* tests). (B)  
1049 *TgApiAT5-3*-expressing oocytes (squares) and uninjected oocytes (circles) were preloaded  
1050 with L-Tyr by incubation in 2.5 mM L-Tyr (filled symbols) for 32 or 72 hr, respectively, or  
1051 not preloaded (open symbols). Following the preincubation period, uptake of [<sup>14</sup>C]Tyr was  
1052 measured in medium containing 1 mM L-Tyr. Data show the mean uptake in 10 oocytes from  
1053 a single experiment  $\pm$  standard deviation, and are representative of 3 independent  
1054 experiments. First order rate equations were fitted to the uptake time courses for the  
1055 preloaded and non-preloaded *TgApiAT5-3*-injected oocytes ( $R^2 = 0.98$  for preloaded, and  $R^2$   
1056  $= 0.95$  for non-preloaded oocytes). Both the first order rate constants for [<sup>14</sup>C]Tyr uptake and  
1057 the maximal [<sup>14</sup>C]Tyr uptake were significantly higher in preloaded compared to non-  
1058 preloaded *TgApiAT5-3*-expressing oocytes ( $P < 0.01$ , Student's *t* tests). (C) *TgApiAT5-3*-  
1059 expressing oocytes were preloaded by incubation in 1 mM [<sup>14</sup>C]Tyr for 32 hr. Subsequent

1060 efflux (filled symbols) and retention (open symbols) of the preloaded labelled substrate was  
1061 measured over the time-course indicated, in the presence of an extracellular medium  
1062 containing 2.5 mM L-Tyr (squares) or extracellular medium lacking of L-Tyr (circles). Data  
1063 show the mean efflux and retention  $\pm$  standard deviation in 3 replicates (measuring  
1064 efflux/retention from 5 oocytes each) from a single experiment, and are representative of 3  
1065 independent experiments. (D) *Trans*-stimulated initial rate kinetic analysis of L-Tyr transport  
1066 by *TgApiAT5-3*. The rate of L-Tyr uptake was measured at a range of [L-Tyr] concentrations  
1067 in the external medium (i.e. [L-Tyr]<sub>cis</sub>) in *TgApiAT5-3*-expressing oocytes preloaded with 0  
1068 mM to 2.5 mM L-Tyr (i.e. [L-Tyr]<sub>trans</sub>). The *TgApiAT5-3*-mediated uptake (calculated by  
1069 subtracting the uptake in uninjected oocytes from the uptake in *TgApiAT5-3*-expressing  
1070 oocytes) at each [L-Tyr]<sub>trans</sub> condition tested conformed to a Michaelis-Menten kinetic model  
1071 ( $R^2 > 0.90$  for all non-linear regressions). The data were fitted to a Scatchard linear regression  
1072 ( $0.89 \leq R^2 \leq 0.98$  for all linear regressions). Data show the mean uptake rate  $\pm$  standard  
1073 deviation in 10 oocytes from a single experiment, and are representative of 2 independent  
1074 experiments.

1075

1076 **Fig 6. *TgApiAT5-3* is an exchanger for aromatic and large neutral amino acids.**

1077 (A) *TgApiAT5-3*-expressing oocytes were pre-injected with a range of L-amino acids at a  
1078 calculated oocyte cytosolic concentration of 5 mM, with the exception of L-Tyr (§) which  
1079 was preloaded via incubation in 2.5 mM L-Tyr for 32 hr, or were not pre-injected (ND96).  
1080 Subsequent uptake of [<sup>14</sup>C]-labelled amino acids was measured over 10 minutes and  
1081 normalised to uptake per minute. Each box in the heat map shows the mean uptake in 10  
1082 oocytes from a single experiment, representative of 3 independent experiments. The  
1083 statistical analyses compare pre-injected/pre-loaded oocytes to ND96 controls for each

1084 substrate tested (\*,  $P < 0.05$ , one-way ANOVA, Dunnet's post-hoc test. Where significance  
1085 values are not shown, the differences are not significant,  $P > 0.05$ ). (B) *TgApiAT5-3-*  
1086 expressing oocytes were preloaded with a range of [ $^{14}\text{C}$ ]-labelled amino acids (calculated  
1087 final concentrations shown beneath each substrate), and efflux of these substrates was  
1088 measured over 5 min in the absence of external amino acids (ND96) or in the presence of 5  
1089 mM external amino acids (with the exception of L-Tyr (§), which was present at a  
1090 concentration of 2.5 mM), and normalised to efflux per minute. Each box in the heat map  
1091 shows the mean efflux from 3 replicates (each comprised of 5 oocytes) from a single  
1092 experiment, representative of 3 independent experiments. Statistical analyses compare trans  
1093 substrates to ND96 controls for each efflux substrate tested (\*,  $P < 0.05$ , one-way ANOVA,  
1094 Dunnet's post-hoc test. Where significance values are not shown, the differences are not  
1095 significant,  $P > 0.05$ ).

1096

1097 **Fig 7. *TgApiAT5-3* mediates the uptake of L-tyrosine and L-phenylalanine into *T.***  
1098 ***gondii.***

1099 Initial rate of uptake of (A) [ $^{14}\text{C}$ ]Tyr, (B) [ $^{14}\text{C}$ ]Phe, and (C) [ $^{14}\text{C}$ ]Arg, in WT,  $\Delta\text{apiAT5-3}$ , and  
1100 (for A and C) *cTgApiAT5-3*/ $\Delta\text{apiAT5-3}$  strain parasites. Uptake was measured in PBS-  
1101 glucose containing either 60  $\mu\text{M}$  unlabelled L-Tyr and 0.1  $\mu\text{Ci/mL}$  [ $^{14}\text{C}$ ]Tyr (A), 15  $\mu\text{M}$   
1102 unlabelled L-Phe and 0.1  $\mu\text{Ci/mL}$  [ $^{14}\text{C}$ ]Phe (B), or 100  $\mu\text{M}$  unlabelled L-Arg and 0.1  $\mu\text{Ci/mL}$   
1103 [ $^{14}\text{C}$ ]Arg (C). The initial rates of transport for each substrate were computed from the initial  
1104 slopes of the fitted single-order exponential curves (Fig S6), and represent the mean  $\pm$  SEM  
1105 from three independent experiments (\*  $P < 0.05$ ; \*\*  $P < 0.01$ ; \*\*\*  $P < 0.001$ ; n.s. = not  
1106 significant; Student's *t* test).

1107

1108 **Fig 8. *In vitro* growth of parasites lacking *TgApiAT5-3* is modulated by the**  
1109 **concentration of aromatic amino acids in the growth medium, and *TgApiAT5-3* is**  
1110 **important for parasite virulence.**

1111 (A-C) Fluorescence growth assay for WT (black) and  $\Delta apiAT5-3$  (red) parasites cultured for  
1112 5 days in DMEM containing a range of L-Tyr (A), L-Phe (B), or L-Trp (C) concentrations.  
1113 Growth is expressed as a percentage of maximum growth measured on day 5 for each  
1114 parasite strain. For  $\Delta apiAT5-3$  in (A), a sigmoidal curve has been fitted to the data. All data  
1115 shown are averaged from three technical replicates (mean  $\pm$  standard deviation), and are  
1116 representative of those obtained in three independent experiments. The concentration of the  
1117 respective L-amino acids in standard DMEM are depicted by a dashed line. (D) Five Balb/c  
1118 mice were infected intraperitoneally with 1,000 RH $\Delta hxgpri$ /Tomato (black) or  $\Delta apiAT5-3$  in  
1119 RH $\Delta hxgpri$ /Tomato (red) strain parasites and monitored for symptoms of toxoplasmosis.

1120

1121 **Fig 9. Model for the uptake of aromatic amino acids in *T. gondii*.**

1122 Depiction of a *T. gondii* parasite (blue) inside a host cell. Aromatic amino acids, including L-  
1123 Tyr, L-Phe and L-Trp, and large neutral amino acids are thought to be translocated across the  
1124 parasitophorous vacuole membrane surrounding the parasite (dashed line) through non-  
1125 selective channels (57). *TgApiAT5-3* (red cylinder) functions as the major L-Tyr uptake  
1126 pathway in *T. gondii*, and may also have a role in L-Trp uptake following the IFN $\gamma$ -mediated  
1127 depletion of this amino acid in the serum. Additionally, *TgApiAT5-3* functions as an  
1128 exchanger, exporting aromatic and large neutral amino acids from the parasite, and thereby  
1129 contributing to the homeostasis of these amino acids. The uptake of L-Phe and L-Trp is  
1130 primarily mediated by alternate, and as yet undefined, uptake pathways (green cylinder).  
1131 These alternate pathways can mediate sufficient L-Tyr uptake for parasite growth in the

1132 absence of *Tg*ApiAT5-3 at high L-Tyr concentrations (when L-Phe and L-Trp concentrations  
1133 are not correspondingly high).

1134

1135 **Supporting Information**

1136 **Fig S1. Multiple sequence alignment of ApiAT family proteins from apicomplexans and**  
1137 **chromerids.**

1138 A multiple sequence alignment of the 67 ApiAT family proteins examined in this study. The  
1139 alignment is presented as a “fingerprint”, where each residue is represented by a thin vertical  
1140 line that has been shaded to represent the degree of conservation (as described previously;  
1141 (58)). Residues with >70 % identity in the ApiAT alignment are depicted in purple, residues  
1142 with 50-70 % identity are depicted in cyan, residues where > 50% of residues have similar  
1143 amino acids or where amino acids are similar to residues in the above identity groupings are  
1144 depicted in magenta, non-conserved residues are depicted in grey, and gaps in the sequences  
1145 are white. The approximate locations of the predicted transmembrane domains are  
1146 represented by numbered bars, and the location of the MFS signature sequence between  
1147 transmembrane domains two and three has been highlighted.

1148

1149 **Fig S2. Multiple sequence alignment of a selection of ApiAT family proteins from**  
1150 **apicomplexans with human LAT3 and LAT4 proteins.**

1151 A multiple sequence alignment of ApiAT-family proteins from apicomplexans (*Tg*ApiAT1,  
1152 *Tg*ApiAT2, *Pb*ApiAT8-1, *Tg*ApiAT6-1 and *Tg*ApiAT5-3) and the human LAT3 and LAT4  
1153 proteins (*Hs*LAT3 and *Hs*LAT4). Residues with >70% sequence identity are shaded in black  
1154 and residues with >70% sequence similarity are shaded in gray. The red box highlights the  
1155 MFS signature sequence.

1156



1157 **Fig S3. Genetic modifications to introduce HA tags into the native loci of *TgApiAT***  
1158 **genes in *T. gondii*.**

1159 (A) Single cross-over recombination approach, where a vector containing a homologous  
1160 flanking sequence to the target gene, in addition to a chloramphenicol resistance marker  
1161 (ChlR), is introduced into *T. gondii* parasites. Single cross-over recombination results in the  
1162 insertion of a HA tag into the 3' region of the open reading frame of the target gene. The  
1163 approximate position of the primers used to screen *TgApiAT7-1*-HA clones are depicted. (B)  
1164 CRISPR/Cas9 genome editing approach, where a guide RNA (gRNA) is designed to target a  
1165 region near the stop codon of the target gene. When co-expressed with Cas9-GFP, the gRNA  
1166 mediates a double-stranded break in the parasite genome near the stop codon of the target  
1167 gene. The gRNA/Cas9-GFP vector is co-transfected with a donor DNA product that contains  
1168 a HA tag flanked on either side with 50 bp of sequence homologous to regions immediately  
1169 up and downstream of the stop codon in the target gene. Homologous repair results in  
1170 introduction of the HA tag into the 3' region of the open reading frame of the target gene. (C)  
1171 PCR screen to test for integration of the HA tag into the *TgApiAT7-1* locus. The presence of  
1172 a 2.5 kb band that is absent from the wild type (WT) control indicates that clones 2-5 have  
1173 successfully integrated the HA tag.

1174

1175 **Fig S4. Characterisation of *TgApiAT5-3* expressed in oocytes**

1176 (A) Western blot with anti-HA antibodies on whole membrane preparations (WMP) and  
1177 surface biotinylated proteins (SB) in oocytes expressing HA-tagged *TgApiAT5-3* (5-3) or  
1178 oocytes that were uninjected (u.i.). (B) Efflux and retention of preloaded [<sup>14</sup>C]Tyr in  
1179 uninjected oocytes. Uninjected oocytes were preloaded by incubation in 1 mM [<sup>14</sup>C]Tyr for  
1180 72 hr as described in methods. Subsequent efflux (filled shapes) and retention (open shapes)

1181 of the preloaded labelled substrate was measured over the time-course indicated in the  
1182 presence in the extracellular buffer of 2.5 mM L-Tyr (squares) or in the absence of L-Tyr  
1183 (circles). Data show the mean efflux and retention in 5 oocytes from a single experiment  $\pm$   
1184 standard deviation, and are representative of 3 independent experiments. (C) *TgApiAT5-3-*  
1185 expressing oocytes (black) or uninjected oocytes (white) were preloaded via incubation in 2.5  
1186 mM L-tyrosine for 32 or 72 hr, respectively, as described in methods. Subsequent uptake of 1  
1187 mM [ $^{14}$ C]Tyr was measured in buffer where the ions were replaced as indicated. For Na<sup>+</sup>  
1188 replacement conditions, the replacement cation is written at the top of the respective  
1189 histogram. Data show the mean uptake in 10 oocytes from a single experiment  $\pm$  standard  
1190 deviation, and are representative of 3 independent experiments. Uptake in *TgApiAT5-3-*  
1191 expressing oocytes was not significantly different in any condition tested ( $P > 0.05$ , one-way  
1192 ANOVA, Dunnet's post-hoc test). (D) *TgApiAT5-3*-expressing oocytes were impaled and  
1193 recorded using a two-voltage clamp amplifier configuration 4-5 days post-cRNA injection.  
1194 Oocytes were continuously perfused with gravity-fed ND96 buffer (pH 7.4) until otherwise  
1195 indicated by the arrows in the current tracings. Top: representative current trace upon the  
1196 addition of 1 mM L-Tyr at  $E_m = -50$  mV or 0 mV. Bottom: representative current trace upon  
1197 the change to pH 9.0 and incubation in 1 mM L-Tyr. No baselines were corrected in either  
1198 tracing. Data are representative of 12 replicates.

1199

## 1200 **Fig S5. Substrate specificity of *TgApiAT5-3***

1201 (A) Uptake of 500  $\mu$ M [ $^{14}$ C]Tyr was measured in *TgApiAT5-3*-expressing oocytes (black) or  
1202 uninjected oocytes (white) over 10 mins in presence of 500  $\mu$ M unlabelled L-amino acids.  
1203 Data show the mean uptake in 10 oocytes from a single experiment  $\pm$  standard deviation, and  
1204 are representative of 2 independent experiments (\*,  $P < 0.05$ , one-way ANOVA, Dunnet's

1205 post-hoc test. Where significance values are not shown, the differences are not significant, P  
1206 > 0.05). (B) Uptake of [<sup>14</sup>C]Tyr in *TgApiAT5-3*-expressing oocytes (black) or uninjected  
1207 oocytes (white) over 10 mins, where oocytes were pre-injected with uptake buffer (ND96),  
1208 preloaded with 2.5 mM L-Tyr, or pre-injected with various substrate mixes, including L-  
1209 amino acids (L-AA1-3), amino acid derivatives (AA derivatives 1-3), D-amino acids (D-  
1210 AA), nucleosides, nitrogen bases, or sugars (see Table S2 for compositions). Data show the  
1211 mean uptake in 8-10 oocytes from a single experiment ± standard deviation, and are  
1212 representative of 3 independent experiments (\*, P < 0.05, one-way ANOVA, Dunnet's post-  
1213 hoc test. Where significance values are not shown, the differences are not significant, P >  
1214 0.05). (C) Uptake of various [<sup>14</sup>C]Amino acids (at 1 mM concentration) was measured  
1215 in *TgApiAT5-3*-expressing oocytes (black) or uninjected oocytes (white) over 10 mins. Data  
1216 show the mean uptake in 10 oocytes from a single experiment ± standard deviation, and are  
1217 representative of 3 independent experiments (\*, P < 0.05, one-way ANOVA, Dunnet's post-  
1218 hoc test, for differences between *TgApiAT5-3*-injected and uninjected oocytes for the same  
1219 substrate. Where significance values are not shown, the differences are not significant, P >  
1220 0.05).

1221

1222 **Fig S6. Time courses for the uptake of [<sup>14</sup>C]Tyr, [<sup>14</sup>C]Phe and [<sup>14</sup>C]Arg in *T. gondii*.**

1223 Uptake of [<sup>14</sup>C]Tyr (A), [<sup>14</sup>C]Phe (B), and [<sup>14</sup>C]Arg (C) in WT (A-C), *ΔapiAT5-3* (A-C), and  
1224 *cTgApiAT5-3/ΔapiAT5-3* (A, C) strain parasites. Uptake was measured in PBS-glucose  
1225 containing either 60 μM unlabelled L-Tyr and 0.1 μCi/mL [<sup>14</sup>C]Tyr (A), 30 μM unlabelled L-  
1226 Phe and 0.1 μCi/mL [<sup>14</sup>C]Phe (B), or 100 μM unlabelled L-Arg and 0.1 μCi/mL [<sup>14</sup>C]Arg  
1227 (C). Data points represent the mean ± SEM from three independent experiments. Lines  
1228 represent fitted single-order exponential curves, from which the initial rates were calculated  
1229 and depicted in Fig 7.

1230

1231 **Fig S7. Complementation of  $\Delta$ apiAT5-3 strain parasites with a constitutive copy of**

1232 ***Tg*ApiAT5-3 restores parasite growth in DMEM.**

1233 Plaque assays depicting growth of TATi/Tomato (WT) parasites (top),  $\Delta$ apiAT5-3 parasites  
1234 (middle), and  $\Delta$ apiAT5-3 parasites complemented with a constitutive copy of *Tg*ApiAT5-3  
1235 (*cTg*ApiAT5-3/ $\Delta$ apiAT5-3; bottom). 500 parasites were added to 25 cm<sup>2</sup> tissue culture flasks  
1236 and cultured in DMEM (left) or DMEM containing 2.5 mM L-Tyr (right) for 11 days before  
1237 fixation and staining with crystal violet. Data are representative of two independent  
1238 experiments.

1239

1240 **Fig S8. *T. gondii* parasites are auxotrophic for all three proteinogenic aromatic amino**

1241 **acids.**

1242 Fluorescence growth assays measuring the growth of WT (black) and  $\Delta$ apiAT5-3 (gray)  
1243 parasites in DMEM containing different concentrations of L-Tyr (A), L-Phe (B) and L-Trp  
1244 (C). The growth of parasites is expressed as a percentage of the optimal concentration for  
1245 each amino acid tested in each parasite strain, and was measured at mid-log phase for this  
1246 optimal concentration (5 days post-inoculation). Parasite growth was determined using the  
1247 same amino acid concentrations used in Fig 8, but included a 0 mM concentration (which  
1248 was not possible to depict in Fig 8 because of the log scale on the x axis). For simplicity, only  
1249 the following amino acid concentrations are depicted in this figure: 0 mM, 0.423 mM and 2.5  
1250 mM L-Tyr (A), 0 mM, 0.32 mM and 10 mM L-Phe (B), and 0 mM, 0.063 mM and 1 mM L-  
1251 Trp (C). The data for 0.423 mM L-Tyr (the normal DMEM concentration of L-Tyr) were  
1252 interpolated from curve fitting while 0.32 mM L-Phe and 0.063 mM L-Trp (the nearest tested

1253 concentrations to those present in DMEM) were experimental data points. Data represent the  
1254 mean  $\pm$  SEM from three independent experiments.

1255

1256 **Fig S9. Preliminary characterisation of the  $\Delta$ *apiAT5-3*/*RH* $\Delta$ *hxgpirt*/Tomato mutant**

1257 (A) Uptake of [ $^{14}$ C]Tyr in *RH* $\Delta$ *hxgpirt*/Tomato (WT, blue) and  $\Delta$ *apiAT5-3* in  
1258 *RH* $\Delta$ *hxgpirt*/Tomato (red) parasites. Uptake was measured in PBS-glucose containing 60  $\mu$ M  
1259 unlabelled L-Tyr and 0.1  $\mu$ Ci/mL [ $^{14}$ C]Tyr. Data points represent the mean from a single  
1260 replicate. Lines represent fitted single-order exponential curves. (B) Fluorescence growth  
1261 assay for  $\Delta$ *apiAT5-3*/*RH* $\Delta$ *hxgpirt*/Tomato parasites cultured for 16 days (when parasites were  
1262 in mid-logarithmic stage) in DMEM containing a range of L-Tyr concentrations. Growth is  
1263 expressed as a percentage of maximum growth measured on day 16, and data points represent  
1264 the mean from three technical replicates ( $\pm$  standard deviation) in a single experiment. The  
1265 concentration of L-Tyr in standard DMEM is depicted by a dashed line. (C) Plaque assays  
1266 depicting growth of *RH* $\Delta$ *hxgpirt*/Tomato (WT) parasites and  $\Delta$ *apiAT5-3*/*RH* $\Delta$ *hxgpirt*/Tomato  
1267 parasites in normal DMEM (top) or DMEM containing 2.5 mM L-Tyr. 1000 parasites were  
1268 added to each 25 cm<sup>2</sup> tissue culture flask and incubated for 8 days (left and centre) or 18 days  
1269 (right) before developing. Data are from a single independent experiment.

1270

**Fig 1**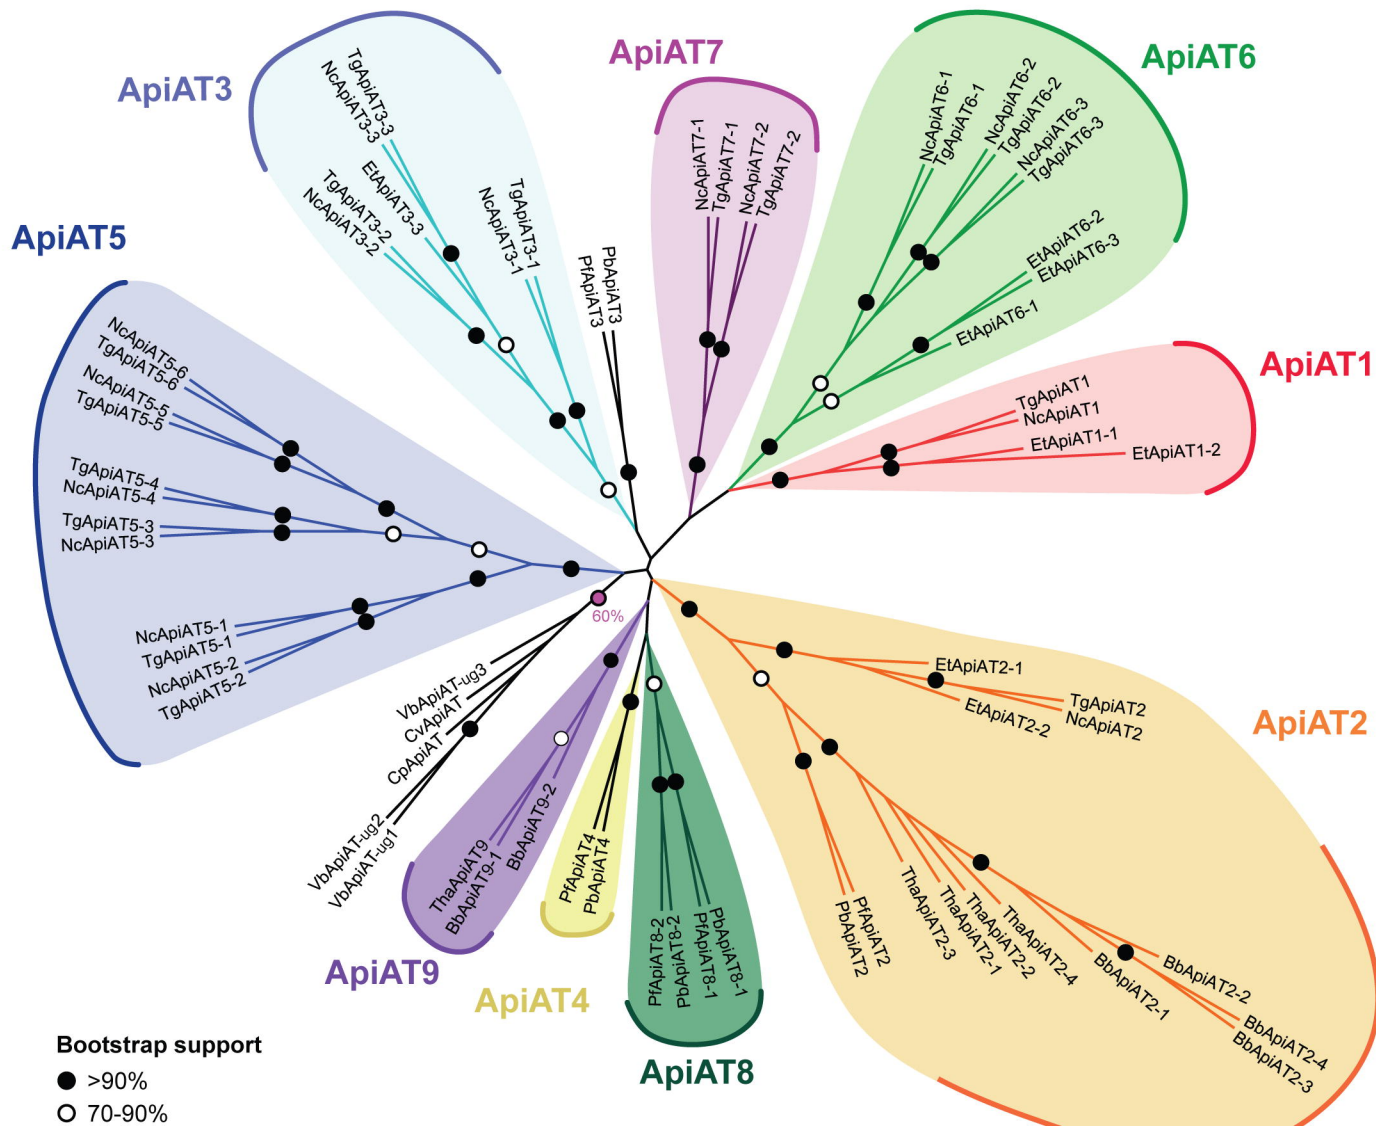

# Fig 2

## A

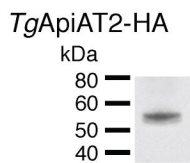

## B

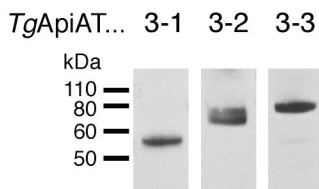

## C

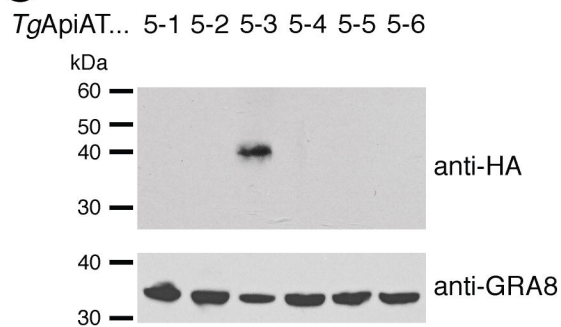

## D

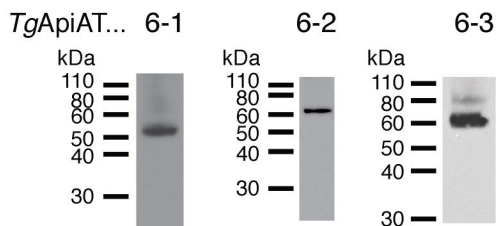

## E

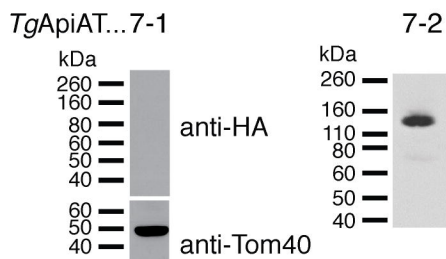

## F

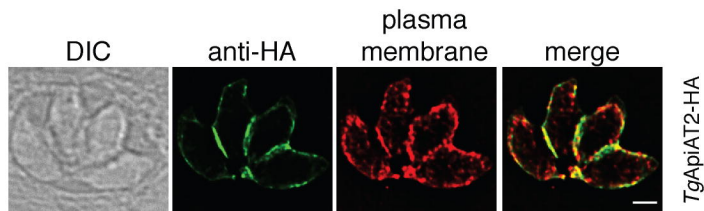

## G

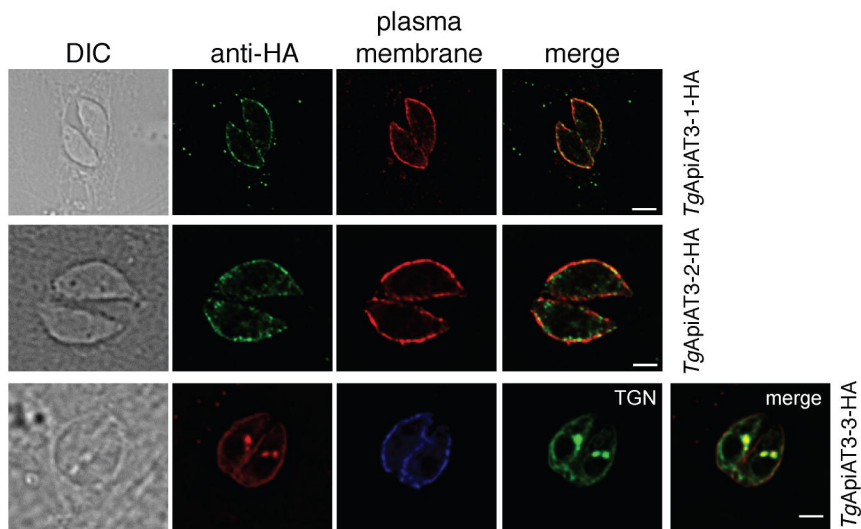

## H

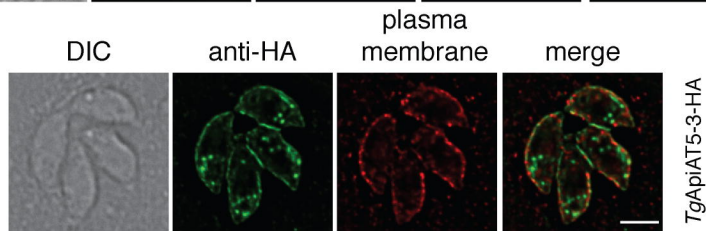

## I

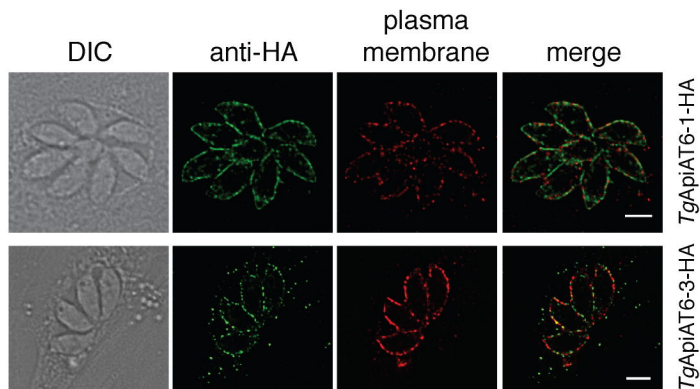

# Fig 3

bioRxiv preprint doi: <https://doi.org/10.1101/306993>; this version posted April 26, 2018. The copyright holder for this preprint (which was not certified by peer review) is the author/funder, who has granted bioRxiv a license to display the preprint in perpetuity. It is made available under aCC-BY-NC-ND 4.0 International license.

**A**

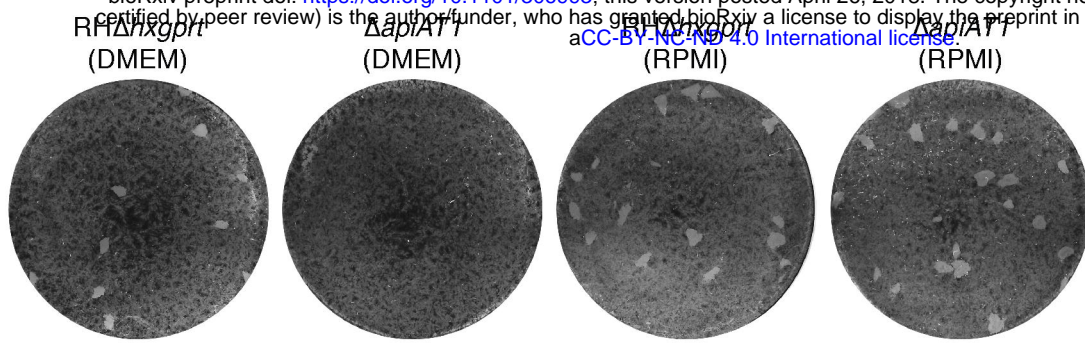

**B**

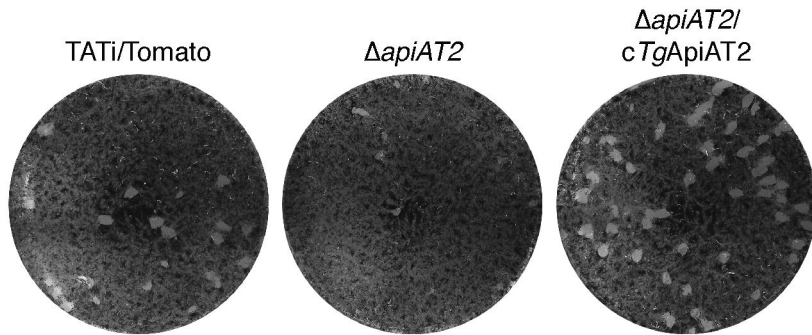

**C**

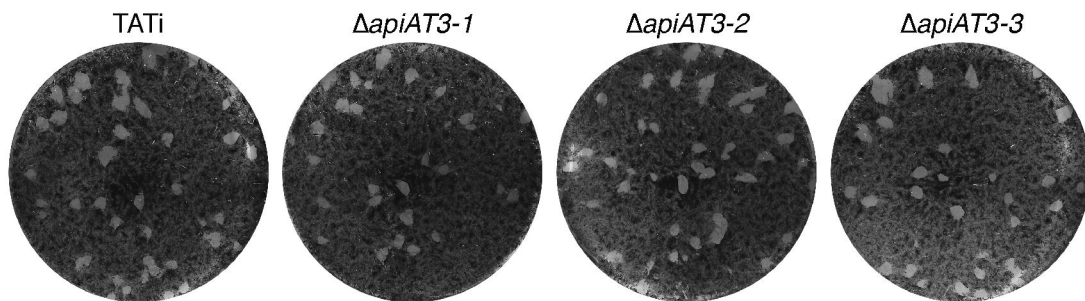

**D**

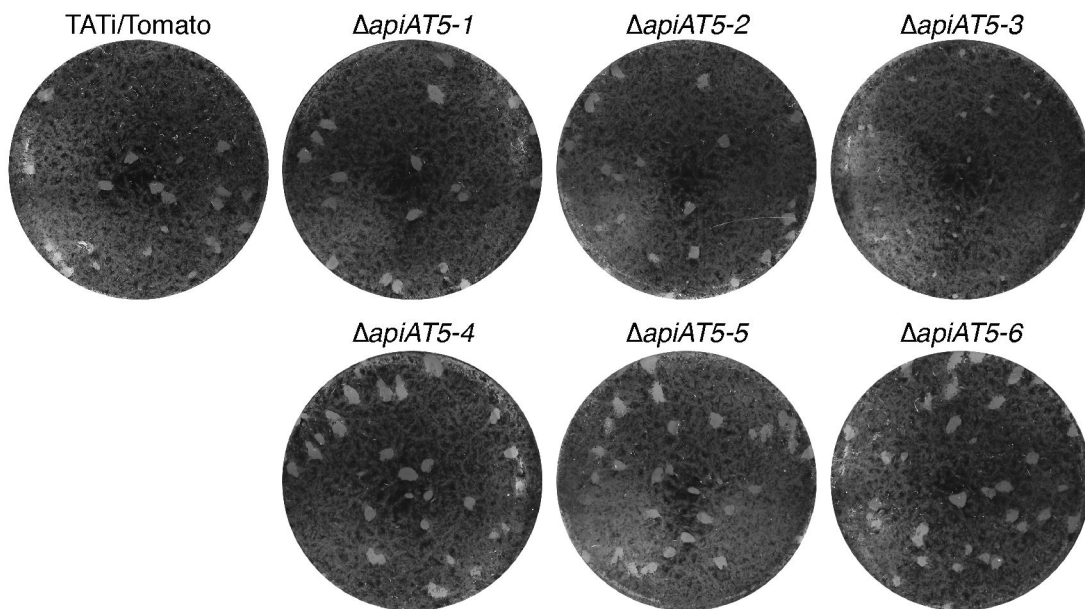

**E**

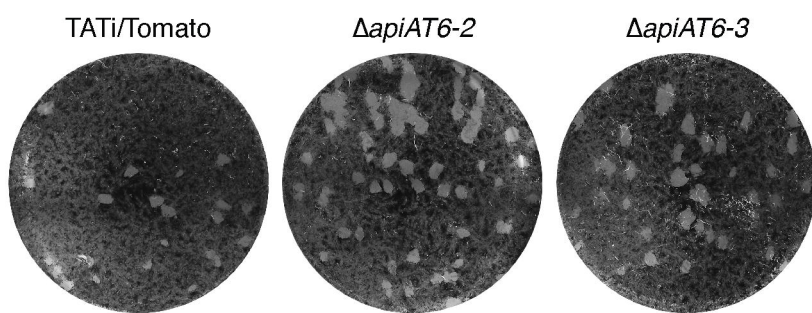

**F**

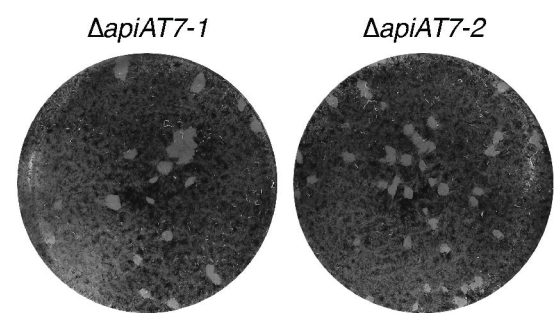



**Fig 4**

**A**

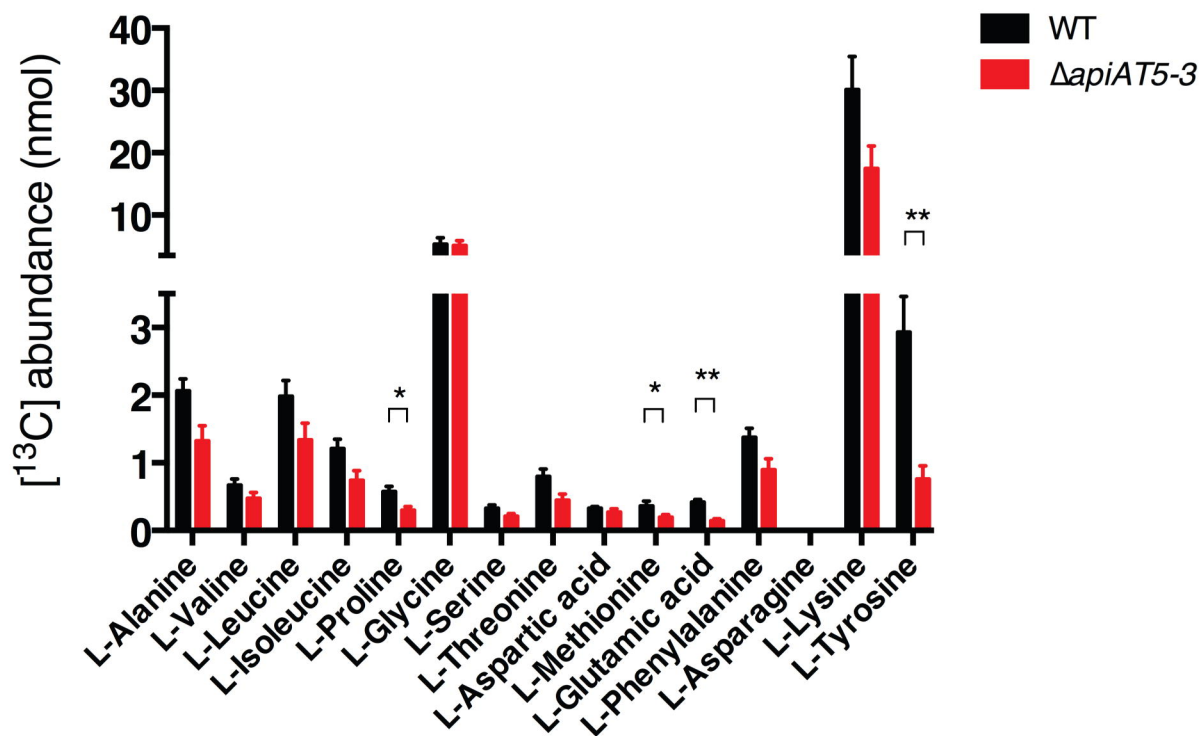

**B**

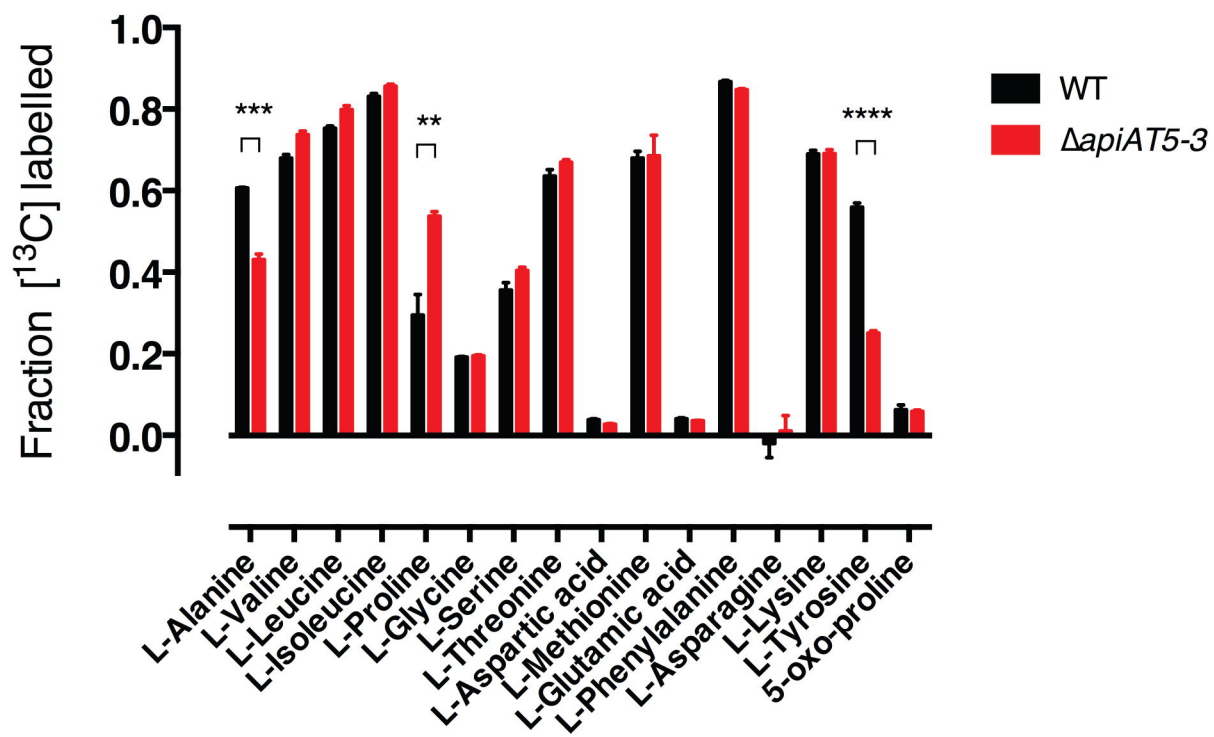

**Fig 5****A**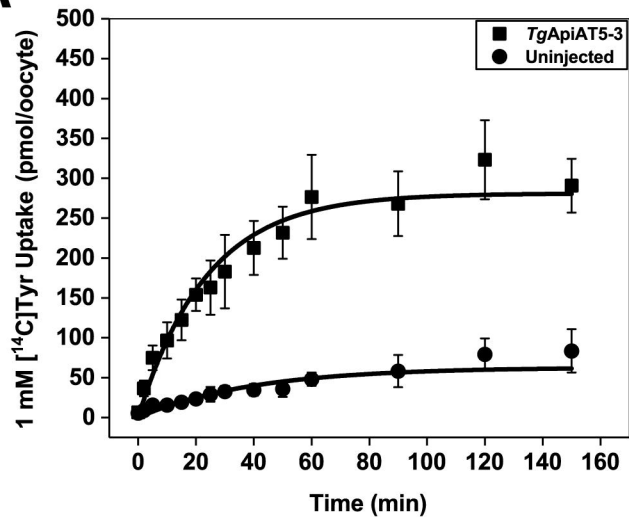**B**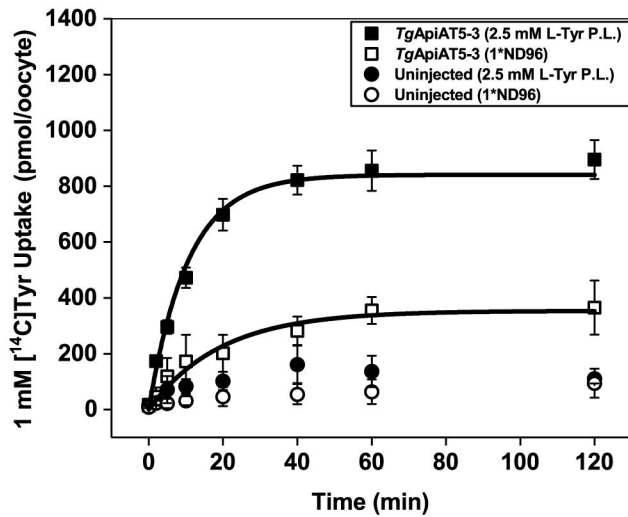**C**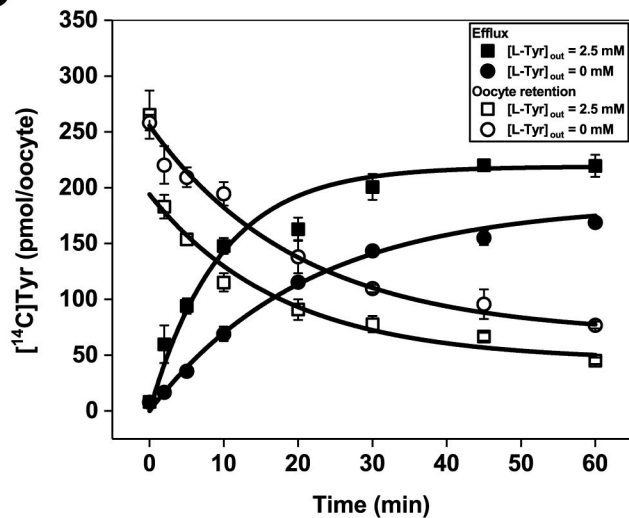**D**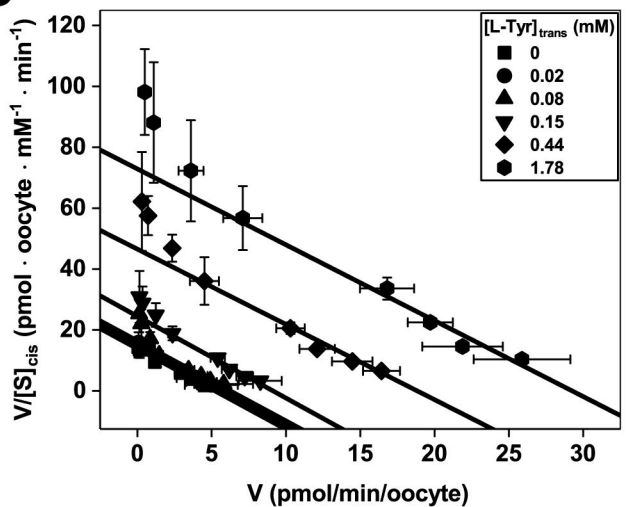

**Fig 6****A**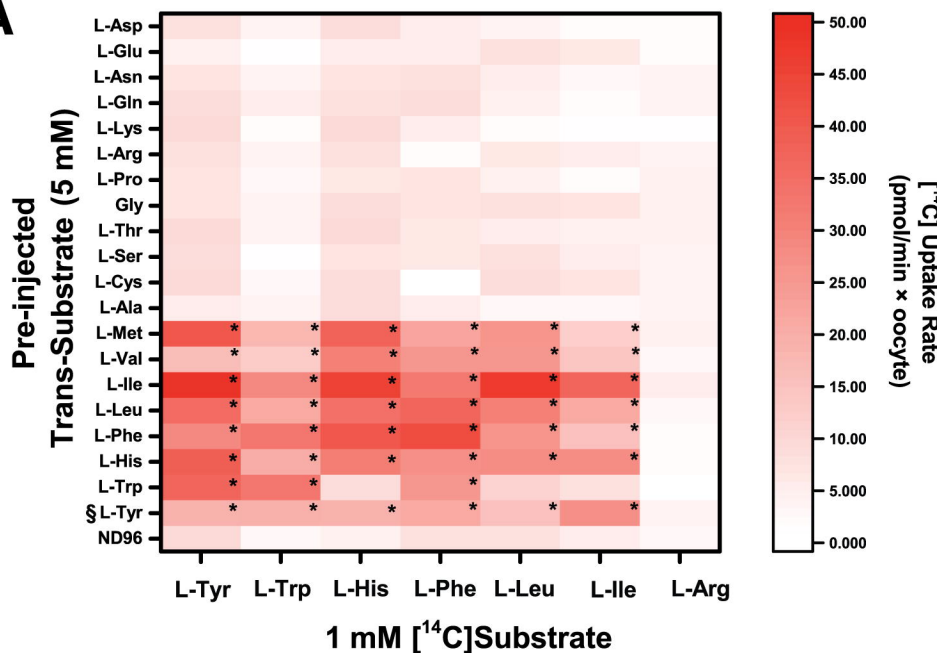**B**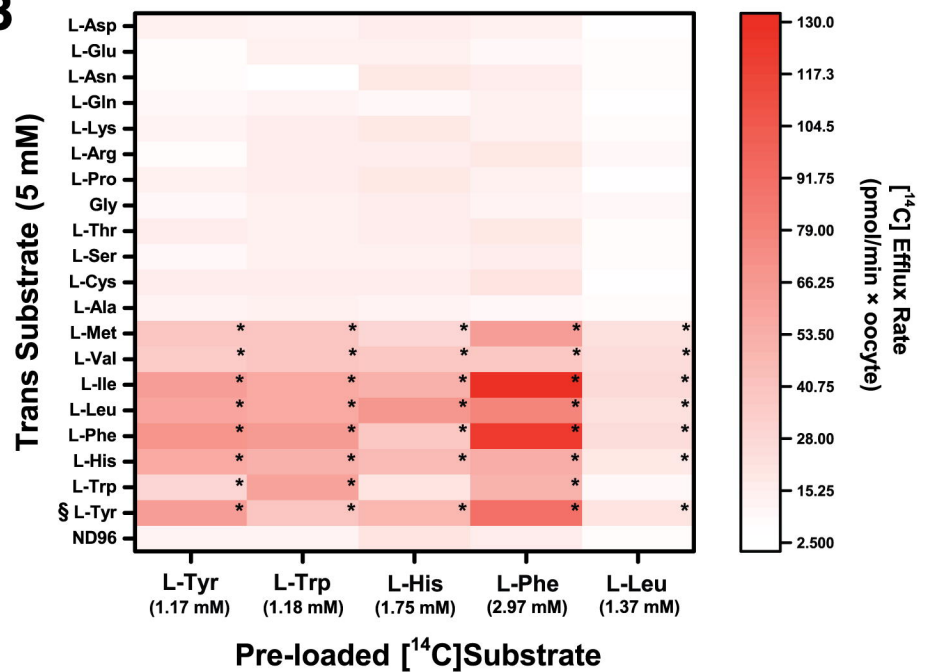

**Fig 7****A**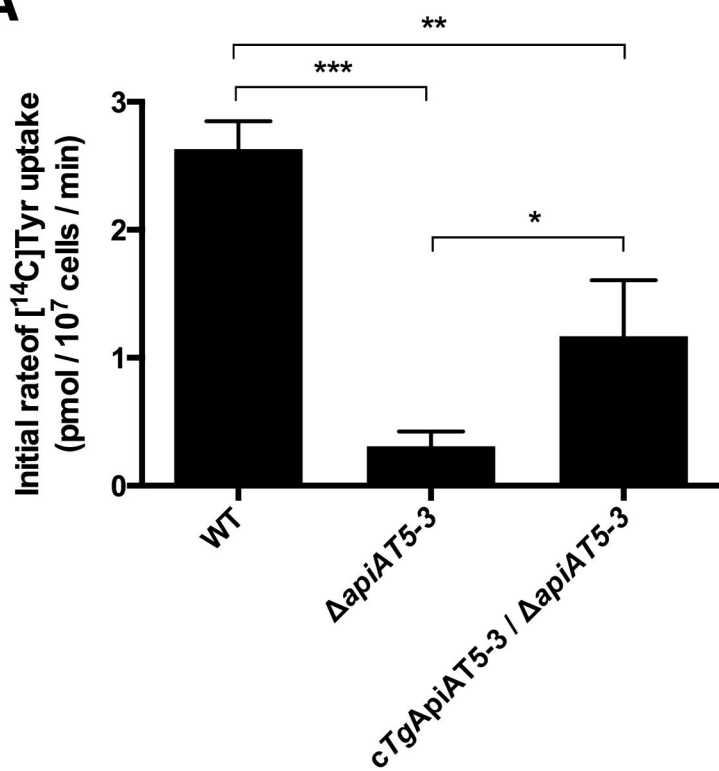**B**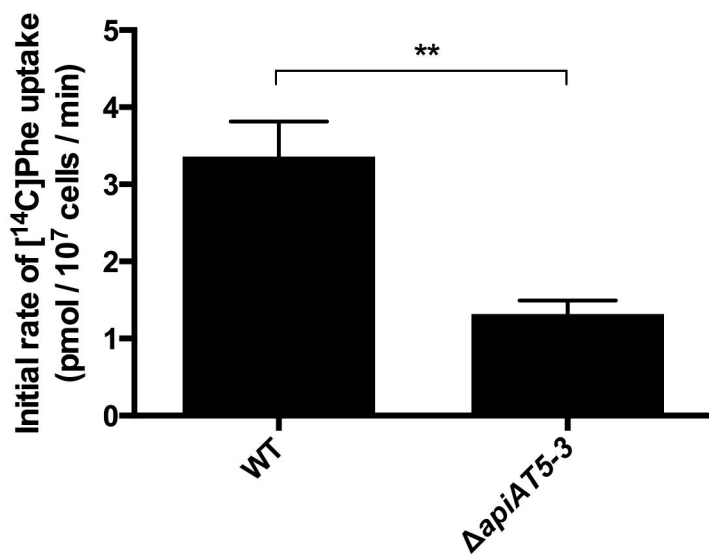**C**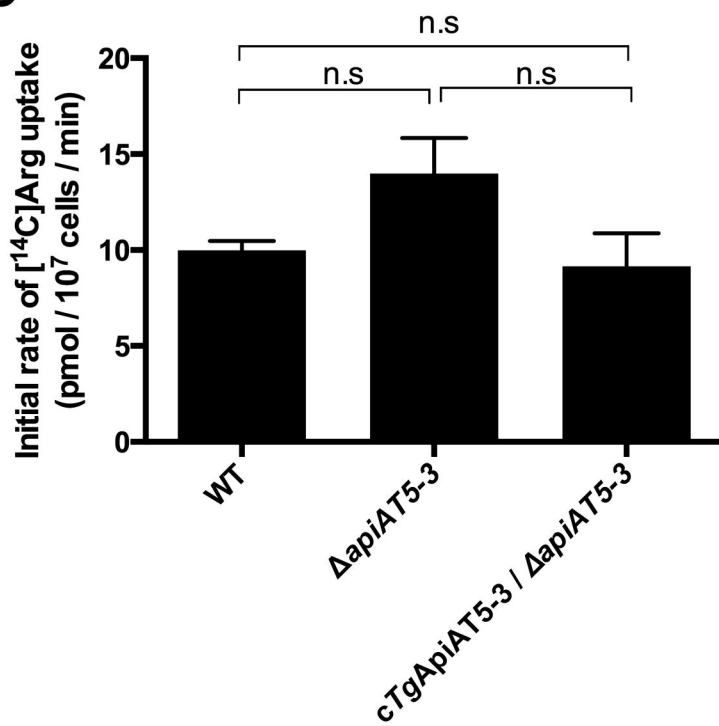

**Fig 8****A**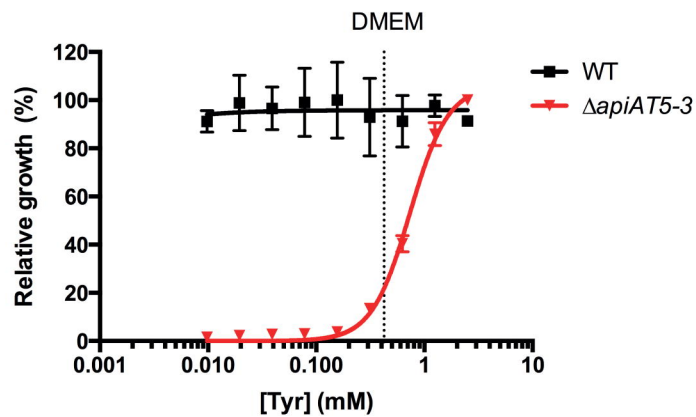**B**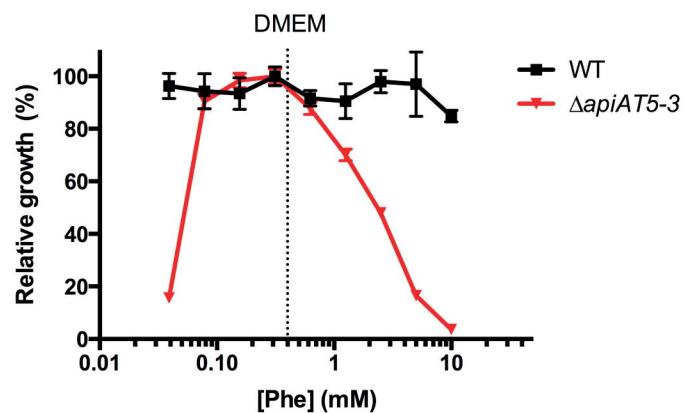**C**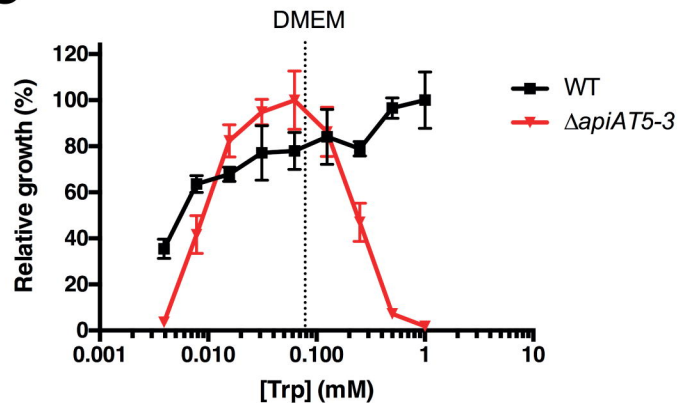**D**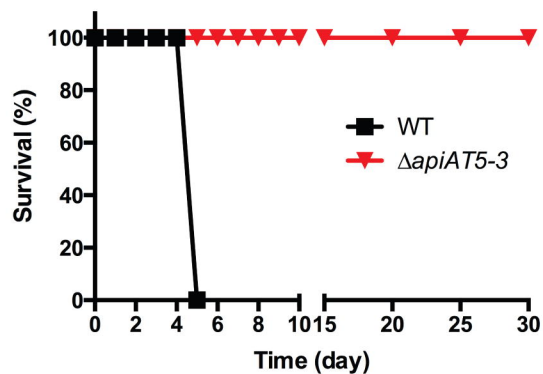

Fig 9

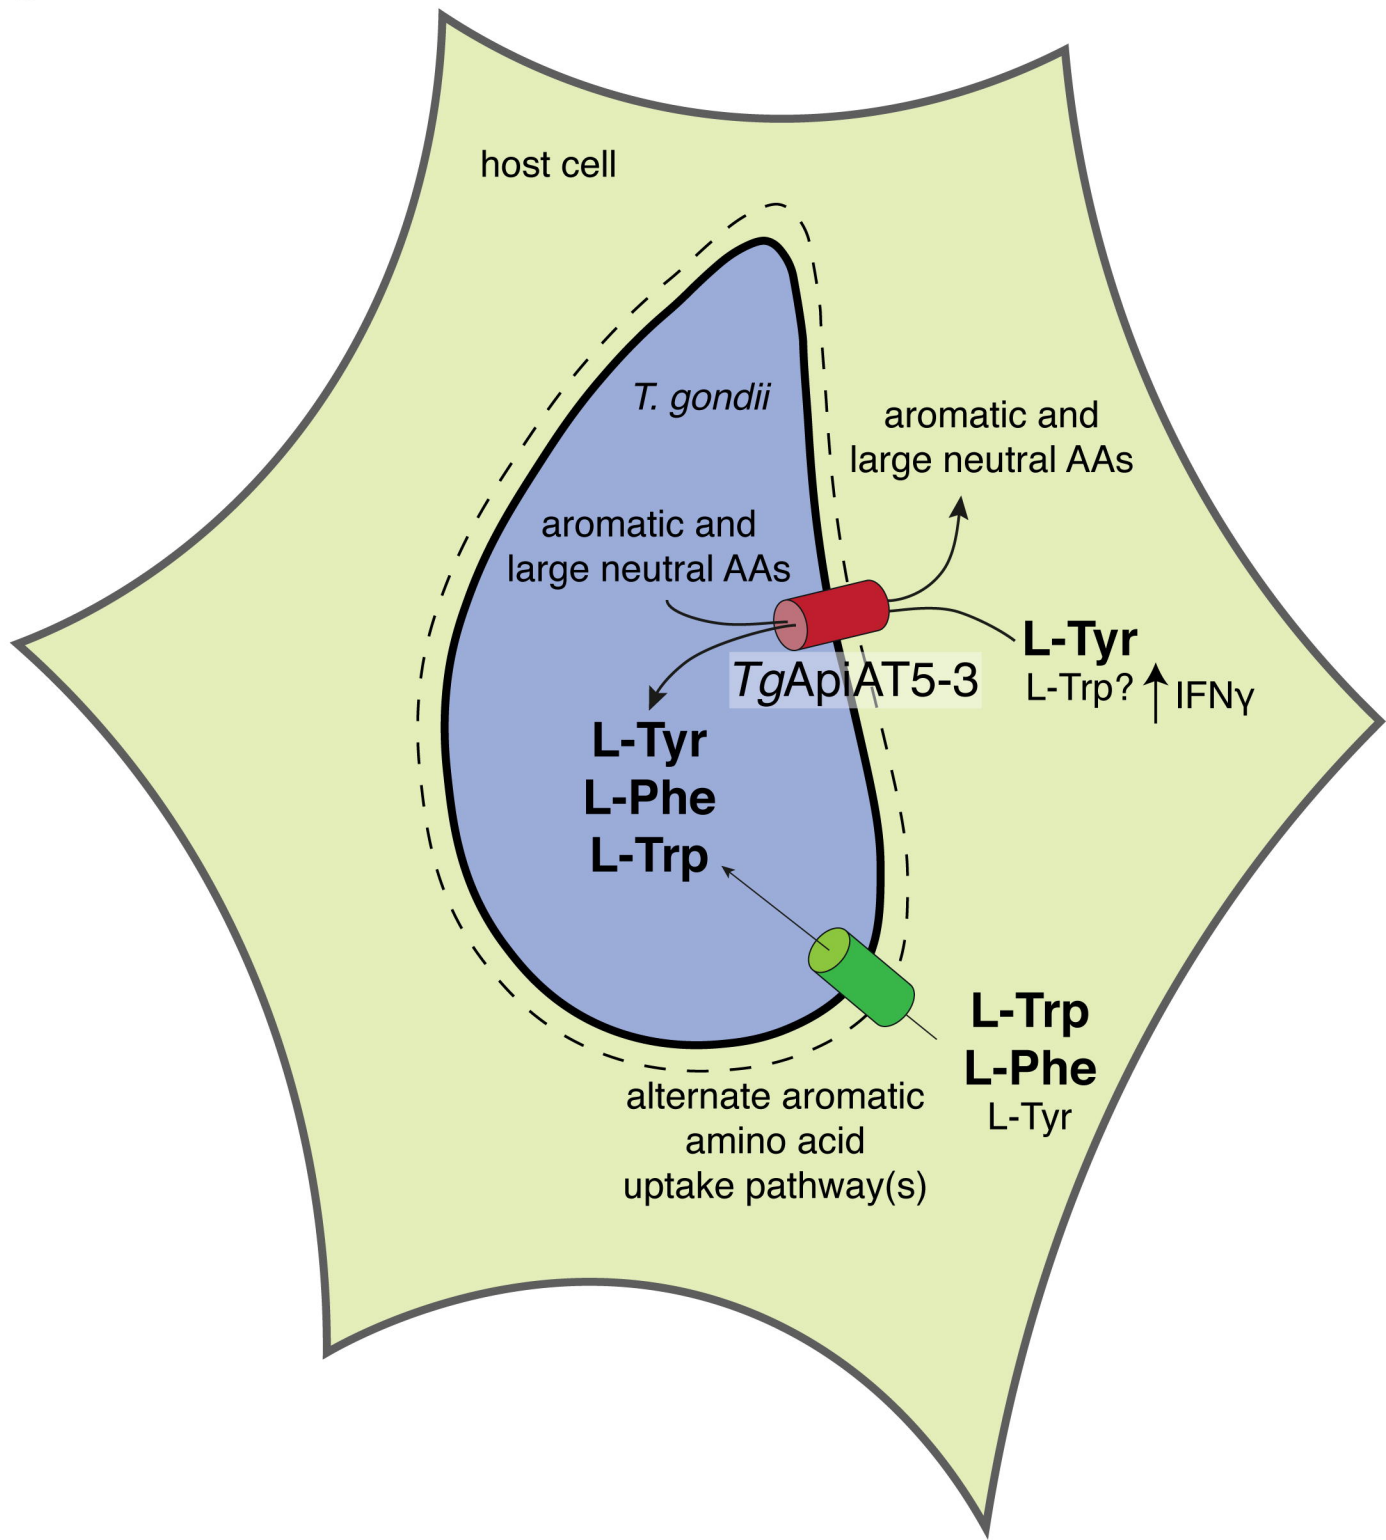

Source: https://www.biorxiv.org/content/10.1101/306993v1.full.pdf
